# Supplementary material
Source: HighWire-hosted journal article supplement (https://oem.bmj.com/highwire/filestream/157470/field_highwire_adjunct_files/1/OEM_Appendix_B_052571.xls)
Supplement: OEM_Appendix_B_052571.xls [file OEM_Appendix_B_052571.xls]

## Sheet: soc_OR_male_TCC_highrisk_040720
Appendix B. Risk of Bladder Cancer by Occupation (SOC), Men and Women, New England, 2001-2004
SOC Code	Occupation	MEN (N=895 Cases, 1,031 Controls)					WOMEN (N=263 Cases, 371 Controls)
		Cases	Controls	OR(c)	Lower CI	Upper CI	Cases	Controls	OR(c)	Lower CI	Upper CI
11	OFFICIALS & ADMINISTRATORS, PUBLIC ADMINISTRATION	15	24	0.8429	0.416692	1.70524	2	6	0.364	0.0693349	1.91102
111	LEGISLATORS	3	2	2.1813	0.318727	14.9285	0	0	NA	--	--
112	CHIEF EXECUTIVES & GENERAL ADMINISTRATORS	2	3	2.1628	0.343826	13.6061	0	0	NA	--	--
113	OFFICIALS & ADMINISTRATORS, GOVERNMENT AGENCIES	12	20	0.7573	0.348506	1.64573	2	6	0.364	0.0693349	1.91102
1131	JUDICIAL, PUBLIC SAFETY AND CORRECTIONS ADMINISTRATORS	2	9	0.2847	0.0561494	1.44381	1	1	2.1463	0.119442	38.5687
1132	HUMAN RESOURCES PROGRAM ADMINISTRATORS	1	0	NA	--	--	0	2	NA	--	--
1133	NATURAL RESOURCES PROGRAM ADMINISTRATORS	0	3	NA	--	--	0	0	NA	--	--
1134	RURAL, URBAN, AND COMMUNITY DEVELOPMENT PROGRAM ADMINISTRATORS	2	2	1.0295	0.135909	7.79951	1	1	1.3047	0.0799807	21.2844
1135	PUBLIC FINANCE, TAXATION, AND OTHER MONETARY PROG ADMINISTRATORS	5	1	3.8798	0.429264	35.0683	0	2	NA	--	--
1139	OFFICIALS AND ADMINISTRATORS, PUBLIC ADMINISTRATION, NEC	2	6	0.4535	0.0841491	2.44417	0	0	NA	--	--
12-13	OFFICIALS & ADMINISTRATORS, OTHER	210	261	0.9919	0.793802	1.2395	36	53	0.8682	0.521745	1.44492
121	GENERAL MANAGERS & OTHER TOP EXECUTIVES	60	68	1.2136	0.8293	1.77623	4	5	0.8099	0.184514	3.55561
122	FINANCIAL MANAGERS	12	18	0.9841	0.451901	2.14307	3	3	1.3501	0.241911	7.53492
123	PERSONNEL & LABOR RELATIONS MANAGERS	6	5	1.262	0.338743	4.70211	2	0	NA	--	--
124	PURCHASING MANAGERS	2	1	1.8513	0.147963	23.1639	0	0	NA	--	--
125	MANAGERS, MARKETING, ADVERTISING & PUBLIC RELATIONS	24	25	1.2362	0.680166	2.24684	1	5	0.3099	0.0298248	3.22138
126	MANAGERS, ENGINEERING, MATHEMATICS & NATURAL SCIENCES	11	17	0.8094	0.365317	1.79339	0	0	NA	--	--
127	MANAGERS, SOCIAL SCIENCES & RELATED FIELDS	7	7	1.2974	0.424722	3.96351	1	3	0.7123	0.0686276	7.39351
128	ADMINISTRATORS, EDUCATION & RELATED FIELDS	12	20	0.9861	0.462305	2.10374	4	11	0.5252	0.149404	1.84626
1281	ADMINISTRATORS, COLLEGES AND UNIVERSITIES	2	4	0.897	0.151852	5.29897	1	4	0.2582	0.0253963	2.62576
1282	ADMINISTRATORS, ELEMENTARY AND SECONDARY EDUCATION	7	12	0.7891	0.295463	2.10763	1	2	2.0169	0.166599	24.418
1283	ADMINISTRATORS, EDUCATION AND RELATED FIELDS, NEC	3	6	0.83	0.197143	3.49455	2	6	0.3665	0.0656734	2.04618
131	MANAGERS, MEDICINE & HEALTH	5	6	1.054	0.292526	3.79817	7	8	1.6652	0.554728	4.99904
132	PRODUCTION MANAGERS, INDUSTRIAL	26	36	0.8431	0.48753	1.45805	1	0	NA	--	--
133	CONSTRUCTION MANAGERS	22	27	0.9335	0.514915	1.69247	0	0	NA	--	--
134	PUBLIC UTILITIES MANAGERS	20	21	0.8384	0.432855	1.62403	2	3	0.5963	0.0802014	4.43482
1341	COMMUNICATIONS OPERATIONS MANAGERS	2	2	0.5935	0.0710884	4.95552	0	1	NA	--	--
1342	TRANSPORTATION FACILITIES AND OPERATIONS MANAGERS	13	13	0.969	0.427263	2.19799	0	0	NA	--	--
1343	ELECTRIC, GAS, WATER, AND SANITARY SERVICES MANAGERS	3	4	0.5423	0.108992	2.69924	0	0	NA	--	--
1344	POSTMASTERS AND MAIL SUPERINTENDENTS	2	2	0.9825	0.121243	7.9629	2	2	0.6346	0.080545	5.00093
135	MANAGERS, SERVICE ORGANIZATIONS	45	53	1.0083	0.653536	1.55586	10	14	0.9595	0.375425	2.45268
1351	MANAGERS, FOOD SERVING AND LODGING ESTABLISHMENTS	25	31	1.0005	0.569632	1.75731	7	9	1.0563	0.349279	3.19479
1352	MANAGERS, ENTERTAINMENT AND RECREATION FACILITIES	4	13	0.2995	0.0922198	0.973105	0	4	NA	--	--
1353	MANAGERS, PROPERTY AND LEASING	11	9	1.2671	0.487672	3.29251	2	1	2.5884	0.170026	39.4048
1354	MANAGERS, MEMBERSHIP ORGANIZATIONS	2	1	3.0355	0.262696	35.0769	0	0	NA	--	--
1359	MANAGERS, SERVICE ORGANIZATIONS, NEC	3	3	1.9252	0.355067	10.4395	1	0	NA	--	--
136	MANAGERS, MINING, QUARRYING, WELL DRILLING, & SIMILAR OPERATIONS	1	0	NA	--	--	0	0	NA	--	--
137	MANAGERS, ADMINISTRATIVE SERVICES (b)	12	20	0.6959	0.327364	1.47965	9	8	1.429	0.503633	4.05496
139	OFFICIALS & ADMINISTRATORS, OTHER, NEC	6	11	0.6007	0.208461	1.73151	0	2	NA	--	--
14	MANAGEMENT RELATED OCCUPATIONS	54	95	0.6576	0.456301	0.947912	20	20	2.6724	1.30269	5.48235
141	ACCOUNTANTS, AUDITORS, & OTHER FINANCIAL SPECIALISTS	22	51	0.5302	0.311422	0.90271	8	8	2.2454	0.775093	6.50493
1412	ACCOUNTANTS AND AUDITORS (b)	14	28	0.5893	0.297414	1.16787	7	5	2.0111	0.551978	7.32775
1414	UNDERWRITERS	1	3	0.432	0.0430836	4.33279	0	0	NA	--	--
1415	LOAN OFFICERS (b)	3	10	0.3714	0.0991597	1.39126	1	0	NA	--	--
1419	OTHER FINANCIAL OFFICERS	5	12	0.6128	0.208477	1.80146	0	3	NA	--	--
142	MANAGEMENT ANALYSTS (b)	4	0	NA	--	--	1	0	NA	--	--
143	PERSONNEL, TRAINING, & LABOR RELATIONS SPECIALISTS (b)	5	8	0.7276	0.219272	2.41444	1	0	NA	--	--
144	PURCHASING AGENTS & BUYERS	7	15	0.4575	0.178547	1.17247	2	3	0.5992	0.0874956	4.10382
1442	BUYERS, WHOLESALE AND RETAIL TRADE, EXCEPT FARM PRODUCTS	2	8	0.3433	0.0689258	1.71071	1	1	0.532	0.0311679	9.08244
1449	PURCHASING AGENTS AND BUYERS, NEC	5	8	0.528	0.163823	1.7019	1	2	0.6669	0.0520308	8.54915
145	BUSINESS & PROMOTION AGENTS	3	1	3.3918	0.327402	35.1396	0	0	NA	--	--
147	INSPECTORS & COMPLIANCE OFFICERS	11	13	1.025	0.434319	2.41917	0	1	NA	--	--
1472	CONSTRUCTION INSPECTORS	2	7	0.3725	0.0690712	2.00993	0	0	NA	--	--
1473	INSPECTORS AND COMPLIANCE OFFICERS, EXCEPT CONSTRUCTION (a)	9	6	1.6574	0.563526	4.87463	0	1	NA	--	--
149	MANAGEMENT RELATED OCCUPATIONS, NEC (b)	8	12	0.8281	0.322261	2.12822	10	10	1.7658	0.639837	4.87329
16	ENGINEERS, SURVEYORS & ARCHITECTS	61	100	0.8909	0.626684	1.26665	1	1	3.2198	0.127586	81.2586
161	ARCHITECTS	2	7	0.413	0.0789605	2.16019	0	1	NA	--	--
162-163	ENGINEERS	55	85	0.7343	0.504355	1.06928	1	0	NA	--	--
1622	AEROSPACE ENGINEERS (a)	6	4	2.3003	0.602585	8.78133	0	0	NA	--	--
1623	METALLURGICAL AND MATERIALS ENGINEERS	1	1	2.2019	0.124648	38.8982	0	0	NA	--	--
1625	PETROLEUM ENGINEERS	1	0	NA	--	--	0	0	NA	--	--
1626	CHEMICAL ENGINEERS	1	6	0.3195	0.036207	2.81974	0	0	NA	--	--
1627	NUCLEAR ENGINEERS	2	2	1.0388	0.124698	8.65532	0	0	NA	--	--
1628	CIVIL ENGINEERS	13	15	0.9588	0.43619	2.1078	0	0	NA	--	--
1633	ELECTRICAL AND ELECTRONIC ENGINEERS	20	32	0.7824	0.428487	1.42879	0	0	NA	--	--
1634	INDUSTRIAL ENGINEERS (a)	12	7	2.1836	0.826153	5.77164	0	0	NA	--	--
1635	MECHANICAL ENGINEERS (a)	8	5	1.4419	0.434752	4.78231	0	0	NA	--	--
1636	COMPUTER ENGINEERS	3	6	0.4666	0.10802	2.016	0	0	NA	--	--
1637	MARINE ENGINEERS AND NAVAL ARCHITECTS	4	5	1.1417	0.285993	4.55846	0	0	NA	--	--
1639	ENGINEERS, NEC	15	23	0.8698	0.430085	1.75929	1	0	NA	--	--
164	SURVEYORS & MAPPING SCIENTISTS	4	10	0.6474	0.192468	2.17812	0	0	NA	--	--
1643	LAND SURVEYORS	4	8	0.8186	0.230742	2.90436	0	0	NA	--	--
1649	SURVEYORS AND MAPPING SCIENTISTS, NEC	0	1	NA	--	--	0	0	NA	--	--
17	COMPUTER, MATHEMATICAL & OPERATIONS RESEARCH OCCUPATIONS	21	31	0.8001	0.440831	1.45251	0	4	NA	--	--
171	COMPUTER SCIENTISTS	15	13	1.4451	0.63964	3.26497	0	3	NA	--	--
1712	COMPUTER SYSTEMS ANALYSTS (a)	13	4	4.3707	1.34299	14.2248	0	2	NA	--	--
1719	COMPUTER SCIENTISTS, NEC	3	9	0.4186	0.101958	1.71866	0	2	NA	--	--
172	OPERATIONS & SYSTEMS RESEARCHERS & ANALYSTS	6	7	0.9606	0.313093	2.94754	0	1	NA	--	--
1721	OPERATIONS RESEARCHERS AND ANALYSTS	1	2	0.4532	0.0394147	5.21278	0	0	NA	--	--
1722	SYSTEMS RESEARCHERS AND ANALYSTS, EXCEPT COMPUTER	5	5	1.1995	0.335087	4.29406	0	1	NA	--	--
173	MATHEMATICAL SCIENTISTS	1	12	0.0997	0.0123837	0.803261	0	0	NA	--	--
1733	STATISTICIANS	1	5	0.3037	0.03343	2.7595	0	0	NA	--	--
1739	MATHEMATICAL SCIENTISTS, NEC	0	7	NA	--	--	0	0	NA	--	--
18	NATURAL SCIENTISTS	15	16	1.259	0.58634	2.70369	0	2	NA	--	--
184	PHYSICAL SCIENTISTS	10	15	0.9408	0.396368	2.23337	0	0	NA	--	--
1845	CHEMISTS, EXCEPT BIOCHEMISTS	5	9	0.7762	0.240137	2.50943	0	0	NA	--	--
1846	ATMOSPHERIC AND SPACE SCIENTISTS	1	2	1.0775	0.090395	12.8437	0	0	NA	--	--
1847	GEOLOGISTS	2	2	1.2584	0.147566	10.7318	0	0	NA	--	--
1849	PHYSICAL SCIENTISTS, NEC	2	3	0.9653	0.141008	6.60826	0	0	NA	--	--
185	LIFE SCIENTISTS	6	3	2.6209	0.600664	11.436	0	2	NA	--	--
1852	FORESTRY AND CONSERVATION SCIENTISTS	3	1	5.3686	0.477982	60.2995	0	0	NA	--	--
1853	AGRICULTURAL AND FOOD SCIENTISTS	1	0	NA	--	--	0	0	NA	--	--
1854	BIOLOGICAL SCIENTISTS	2	1	2.1427	0.188305	24.3826	0	2	NA	--	--
1855	MEDICAL SCIENTISTS	0	0	NA	--	--	0	1	NA	--	--
19	SOCIAL SCIENTISTS & URBAN PLANNERS	3	8	0.4745	0.117097	1.92349	2	6	0.6224	0.0984862	3.93362
191	SOCIAL SCIENTISTS	3	7	0.5278	0.126098	2.20999	2	6	0.6224	0.0984862	3.93362
1912	ECONOMISTS	2	2	1.0207	0.137044	7.60312	0	0	NA	--	--
1913	HISTORIANS	0	0	NA	--	--	0	1	NA	--	--
1915	PSYCHOLOGISTS	1	5	0.2624	0.0265005	2.59875	2	5	0.7487	0.107895	5.19589
192	URBAN & REGIONAL PLANNERS	0	1	NA	--	--	0	0	NA	--	--
20	SOCIAL, RECREATION & RELIGIOUS WORKERS	18	28	0.8163	0.42777	1.55795	13	8	2.3988	0.88024	6.53737
203	SOCIAL & RECREATION WORKERS	10	15	0.749	0.308584	1.81833	12	7	2.6211	0.894562	7.67993
2032	SOCIAL WORKERS (b)	8	8	1.0276	0.352827	2.99325	10	6	2.6076	0.821242	8.27983
2033	RECREATION WORKERS	2	6	0.3827	0.0653534	2.24178	2	2	1.2998	0.131358	12.8628
204	RELIGIOUS WORKERS	8	13	0.9029	0.356001	2.29043	1	1	1.2427	0.0746357	20.6941
2042	CLERGY	6	12	0.7668	0.275516	2.13454	1	0	NA	--	--
2049	RELIGIOUS WORKERS NEC	2	2	1.0635	0.133166	8.49473	0	1	NA	--	--
21	LAWYERS & JUDGES	10	10	1.6415	0.63679	4.23152	1	0	NA	--	--
211	LAWYERS	10	10	1.6415	0.63679	4.23152	1	0	NA	--	--
22	TEACHERS, COLLEGE, UNIVERSITY & OTHER POSTSECONDARY INSTITUTION	25	35	1.339	0.770248	2.32778	6	23	0.481	0.180497	1.28224
221	TEACHERS, SCIENCES/CHEMISTRY/PHYSICS/PSYCHOLOGY/ECONOMICS	1	4	0.3004	0.0315176	2.86386	0	1	NA	--	--
2212	ATMOSPHERIC, EARTH, MARINE, AND SPACE SCIENCES TEACHERS	0	1	NA	--	--	0	0	NA	--	--
2213	BIOLOGICAL SCIENCES TEACHERS	1	0	NA	--	--	0	1	NA	--	--
2215	PHYSICS TEACHERS	0	1	NA	--	--	0	0	NA	--	--
2218	ECONOMICS TEACHERS	0	2	NA	--	--	0	0	NA	--	--
222	TEACHERS, HISTORY/POLITICAL SCIENCE/ENGINEERING/MATH/COMPUTER SCIENCE	4	7	1.0986	0.300759	4.01331	0	5	NA	--	--
2222	HISTORY TEACHERS	1	1	2.6379	0.145543	47.8141	0	0	NA	--	--
2225	SOCIAL SCIENCES TEACHERS, NEC	0	1	NA	--	--	0	1	NA	--	--
2226	ENGINEERING TEACHERS	1	1	1.0275	0.0615114	17.1667	0	0	NA	--	--
2227	MATHEMATICAL SCIENCES TEACHERS	0	4	NA	--	--	0	2	NA	--	--
2228	COMPUTER SCIENCE TEACHERS	2	0	NA	--	--	0	2	NA	--	--
223	TEACHERS, HEALTH SPECIALTIES/BUSINESS/AGRICULTURE/ART/MUSIC/ENGLISH	11	6	3.8658	1.35486	11.0304	3	13	0.5543	0.145105	2.1175
2231	MEDICAL SCIENCE TEACHERS	0	0	NA	--	--	0	2	NA	--	--
2232	HEALTH SPECIALTIES TEACHERS, NEC (a)	2	0	NA	--	--	0	8	NA	--	--
2233	BUSINESS, COMMERCE AND MARKETING TEACHERS (a)	2	1	3.3524	0.296916	37.8527	0	0	NA	--	--
2234	AGRICULTURE TEACHERS	0	1	NA	--	--	0	0	NA	--	--
2235	ART, DRAMA, AND MUSIC TEACHERS	1	3	0.6666	0.0577231	7.69832	3	1	9.2901	0.807694	106.855
2236	PHYSICAL EDUCATION TEACHERS	0	0	NA	--	--	0	1	NA	--	--
2237	EDUCATION TEACHERS (a)	1	0	NA	--	--	0	0	NA	--	--
2238	ENGLISH TEACHERS (a)	5	1	9.4862	1.04582	86.0458	0	1	NA	--	--
224	TEACHERS, LAW/THEOLOGY/TRADE AND INDUSTRIAL/POSTSECONDARY NEC	5	10	0.6805	0.213199	2.17252	2	2	1.7453	0.21982	13.8578
2242	FOREIGN LANGUAGE TEACHERS	2	1	3.5314	0.243312	51.2568	0	0	NA	--	--
2243	LAW TEACHERS	0	2	NA	--	--	0	0	NA	--	--
2245	THEOLOGY TEACHERS	1	1	2.2418	0.089882	55.9169	0	0	NA	--	--
2246	TRADE AND INDUSTRIAL TEACHERS	0	3	NA	--	--	0	0	NA	--	--
2247	HOME ECONOMICS TEACHERS	0	0	NA	--	--	0	1	NA	--	--
2249	TEACHERS, POSTSECONDARY, NEC	2	3	0.7064	0.112692	4.42899	2	1	2.6716	0.229118	31.1535
23	TEACHERS, EXCEPT POSTSECONDARY INSTITUTION	58	87	1.0011	0.689814	1.45301	32	63	0.9125	0.541048	1.53905
231	PREKINDERGARTEN & KINDERGARTEN TEACHERS	0	0	NA	--	--	3	6	1.112	0.243233	5.08436
232	ELEMENTARY SCHOOL TEACHERS	3	12	0.3658	0.0987241	1.35605	7	15	0.7087	0.254465	1.97393
233	SECONDARY SCHOOL TEACHERS	23	56	0.6678	0.393937	1.13223	11	15	1.4881	0.615863	3.59588
235	TEACHERS, SPECIAL EDUCATION (b)	4	2	2.8866	0.441816	18.8607	5	6	1.8387	0.482377	7.00889
236	INSTRUCTIONAL COORDINATORS	4	1	5.0855	0.549646	47.0543	1	1	5.0387	0.301644	84.1695
239	ADULT EDUCATION & OTHER TEACHERS, NEC	20	17	1.367	0.679089	2.75201	8	18	0.6566	0.246464	1.74947
24	VOCATIONAL & EDUCATIONAL COUNSELORS	7	9	1.2557	0.438609	3.5953	3	2	3.2037	0.383606	26.756
25	LIBRARIANS, ARCHIVISTS, & CURATORS	3	4	1.0326	0.207707	5.13411	1	13	0.1205	0.0149112	0.97498
251	LIBRARIANS	2	2	0.9981	0.132988	7.49217	1	12	0.1447	0.0176805	1.18525
252	ARCHIVISTS AND CURATORS	1	2	1.0937	0.0797777	14.9959	0	1	NA	--	--
26	PHYSICIANS & DENTISTS	7	11	1.7319	0.639726	4.68883	0	0	NA	--	--
261	PHYSICIANS	6	8	2.0444	0.672874	6.21211	0	0	NA	--	--
262	DENTISTS	1	4	0.733	0.0772423	6.95724	0	0	NA	--	--
27	VETERINARIANS	1	0	NA	--	--	0	2	NA	--	--
29	REGISTERED NURSES	2	3	0.8248	0.124904	5.4469	13	25	0.9395	0.438546	2.0129
30	PHARMACISTS, DIETITIANS, THERAPISTS, & PHYSICIANS ASSISTANTS	2	2	1.3726	0.128872	14.6196	1	7	0.3076	0.0324715	2.91397
301	PHARMACISTS	0	2	NA	--	--	0	0	NA	--	--
302	DIETITIANS	1	0	NA	--	--	0	1	NA	--	--
303	THERAPISTS	1	0	NA	--	--	1	5	0.4562	0.0418508	4.9731
3031	RESPIRATORY THERAPISTS	1	0	NA	--	--	0	0	NA	--	--
3032	OCCUPATIONAL THERAPISTS	0	0	NA	--	--	0	2	NA	--	--
3033	PHYSICAL THERAPISTS	0	0	NA	--	--	0	2	NA	--	--
3039	THERAPISTS, NEC	0	0	NA	--	--	1	1	5.8517	0.340311	100.624
304	PHYSICIANS ASSISTANTS	0	0	NA	--	--	0	1	NA	--	--
32	WRITERS, ARTISTS, PERFORMERS, & RELATED WORKERS	24	33	1.1502	0.653233	2.02546	12	8	3.721	1.35351	10.23
321	AUTHORS	1	3	0.5541	0.0536295	5.72645	0	0	NA	--	--
322	DESIGNERS (b)	5	16	0.4438	0.151506	1.30035	7	5	1.9122	0.536618	6.81461
323	MUSICIANS & COMPOSERS (a, b)	8	5	1.9253	0.594188	6.23841	1	1	1.6586	0.0708237	38.8441
324	ACTORS & DIRECTORS	2	1	1.3823	0.111794	17.0933	0	1	NA	--	--
325	PAINTERS, SCULPTORS, CRAFT-ARTISTS, & ARTIST-PRINTMAKERS (b)	3	3	1.6017	0.294025	8.72581	3	0	NA	--	--
326	PHOTOGRAPHERS (a)	6	5	1.5707	0.432035	5.71049	1	2	1.106	0.0683787	17.8893
329	WRITERS, ARTISTS, & RELATED WORKERS, NEC	2	1	1.9608	0.172374	22.3054	0	0	NA	--	--
33	EDITORS, REPORTERS, PUBLIC RELATIONS SPECIALISTS, & ANNOUNCERS	7	10	1.0627	0.374531	3.01582	3	5	1.2363	0.249739	6.12038
331	EDITORS & REPORTERS	6	6	2.1485	0.65501	7.04767	2	4	1.3951	0.208393	9.34048
3312	EDITORS	4	3	3.5651	0.764709	16.6212	2	3	2.824	0.397789	20.0495
3313	REPORTERS	3	5	1.1027	0.243694	4.99034	0	1	NA	--	--
332	PUBLIC RELATIONS SPECIALISTS & PUBLICITY WRITERS	1	3	0.6399	0.0660218	6.20216	1	1	0.9464	0.0566021	15.8241
333	RADIO, TV, & OTHER ANNOUNCERS	1	3	0.1758	0.016697	1.85117	0	0	NA	--	--
34	ATHLETES & RELATED WORKERS	2	7	0.645	0.127138	3.27248	0	0	NA	--	--
36	HEALTH TECHNOLOGISTS & TECHNICIANS	12	15	1.1091	0.491308	2.50394	11	11	1.8097	0.688712	4.75555
362	CLINICAL LABORATORY TECHNOLOGISTS & TECHNICIANS	2	2	0.614	0.0776959	4.85282	0	2	NA	--	--
363	DENTAL HYGIENISTS	0	1	NA	--	--	1	1	3.9736	0.20844	75.7532
364	HEALTH RECORD TECHNOLOGISTS & TECHNICIANS	0	1	NA	--	--	1	1	2.8574	0.0988549	82.597
365	RADIOLOGIC TECHNOLOGISTS & TECHNICIANS	0	2	NA	--	--	0	2	NA	--	--
366	LICENSED PRACTICAL NURSES	2	1	3.3121	0.288027	38.0882	5	5	1.6879	0.415725	6.85369
369	HEALTH TECHNOLOGISTS & TECHNICIANS, NEC (a)	9	8	1.8857	0.683734	5.20073	4	0	NA	--	--
37	ENGINEERING & RELATED TECHNOLOGISTS & TECHNICIANS	57	51	1.3737	0.910685	2.07232	2	4	0.3543	0.0484153	2.59375
371	ENGINEERING TECHNOLOGISTS & TECHNICIANS	29	29	1.205	0.692821	2.09608	2	2	0.8715	0.0973545	7.80226
3711	ELECTRICAL/ELECTRONIC ENGINEERING TECHNOLOGISTS AND TECHNICIANS	22	20	1.3231	0.692578	2.52784	1	2	0.4327	0.0273763	6.83993
3712	INDUSTRIAL ENGINEERING TECHNOLOGISTS AND TECHNICIANS	2	1	1.7147	0.144388	20.3639	0	0	NA	--	--
3713	MECHANICAL ENGINERING TECHNOLOGISTS AND TECHNICIANS	3	2	2.0725	0.332445	12.9213	0	0	NA	--	--
3719	ENGINEERING TECHNOLOGISTS AND TECHNICIANS, NEC	5	7	0.8597	0.257055	2.87562	1	0	NA	--	--
372	DRAFTING OCCUPATIONS (a)	28	18	1.9611	1.04639	3.67557	0	2	NA	--	--
373	SURVEYING & MAPPING TECHNICIANS	3	5	0.4718	0.10395	2.14139	0	0	NA	--	--
3733	SURVEYING TECHNICIANS	2	4	0.3791	0.0629503	2.28364	0	0	NA	--	--
3734	CARTOGRAPHIC TECHNICIANS	1	1	0.8508	0.0480069	15.0784	0	0	NA	--	--
38	SCIENCE TECHNOLOGISTS & TECHNICIANS	14	22	1.0613	0.514202	2.19081	2	7	0.6278	0.120263	3.27808
382	BIOLOGICAL TECHNOLOGISTS & TECHNICIANS, EXCEPT HEALTH	2	1	3.4686	0.258349	46.5716	0	0	NA	--	--
383	CHEMICAL & NUCLEAR TECHNOLOGISTS & TECHNICIANS	5	5	1.5774	0.396398	6.27772	0	1	NA	--	--
3831	CHEMICAL TECHNOLOGISTS AND TECHNICIANS	3	4	0.7624	0.146276	3.97443	0	1	NA	--	--
3833	PETROLEUM TECHNOLOGISTS AND TECHNICIANS	0	1	NA	--	--	0	0	NA	--	--
389	SCIENCE TECHNOLOGISTS & TECHNICIANS, NEC	8	17	0.8112	0.333741	1.97193	2	7	0.6278	0.120263	3.27808
39	TECHNICIANS, EXCEPT HEALTH, ENGINEERING, & SCIENCE	45	49	1.0562	0.680981	1.6382	4	7	1.7012	0.390726	7.4077
392	AIR TRAFFIC CONTROLLERS	6	5	1.3127	0.368936	4.67131	0	0	NA	--	--
393	RADIO & RELATED OPERATORS	19	16	1.2324	0.603218	2.51824	1	0	NA	--	--
396	LEGAL TECHNICIANS	1	3	0.8214	0.0804101	8.39199	1	2	1.8856	0.148203	23.9924
397	PROGRAMMERS	7	10	0.7737	0.277286	2.15886	0	4	NA	--	--
3971	PROGRAMMERS, BUSINESS	1	2	0.3551	0.0280313	4.50055	0	0	NA	--	--
3972	PROGRAMMERS, SCIENTIFIC	0	2	NA	--	--	0	0	NA	--	--
398	TECHNICAL WRITERS	3	3	1.3591	0.264621	6.98136	2	0	NA	--	--
399	TECHNICIANS, NEC	10	12	0.983	0.410069	2.3568	0	1	NA	--	--
40	SUPERVISORS, MARKETING & SALES OCCUPATIONS	91	117	0.7949	0.584708	1.08071	21	22	1.5515	0.779013	3.09003
401	SUPERVISORS; SALES OCCUPATIONS, INSURANCE, REAL ESTATE, & BUSINESS SERVICES	6	3	2.764	0.675566	11.3091	0	0	NA	--	--
402	SUPERVISORS; SALES OCCUPATIONS, COMMODITIES EXCEPT RETAIL	13	18	0.7428	0.350569	1.57399	0	1	NA	--	--
403	SUPERVISORS; SALES OCCUPATIONS, RETAIL	75	97	0.7891	0.564677	1.10285	21	21	1.6539	0.822912	3.32426
41	INSURANCE, SECURITIES, REAL ESTATE, & BUSINESS SERVICE SALES OCCUPATIONS	44	58	0.8419	0.552135	1.28382	6	10	0.8215	0.245518	2.74895
412	INSURANCE, REAL ESTATE, & SECURITIES SALES OCCUPATIONS	38	47	0.8896	0.562157	1.40798	6	9	0.8906	0.257192	3.08464
4122	INSURANCE SALES OCCUPATIONS	20	16	1.4592	0.73199	2.90903	0	3	NA	--	--
4123	REAL ESTATE SALES OCCUPATIONS	16	26	0.648	0.334446	1.25552	6	6	1.4607	0.363897	5.86389
4124	SECURITIES AND FINANCIAL SERVICE SALES OCCUPATIONS	3	6	0.4891	0.110638	2.16251	0	0	NA	--	--
415	BUSINESS SERVICE SALES OCCUPATIONS	9	14	0.7071	0.293578	1.70311	0	1	NA	--	--
4152	BUSINESS SERVICE, EXCEPT ADVERTISING, SALES OCCUPATIONS	3	7	0.4789	0.114119	2.01002	0	0	NA	--	--
4153	ADVERTISING AND RELATED SALES OCCUPATIONS	6	7	0.9199	0.297737	2.84273	0	1	NA	--	--
42	SALES OCCUPATIONS, COMMODITIES EXCEPT RETAIL	48	66	0.8808	0.588969	1.31731	3	3	1.4672	0.222996	9.6547
421	SALES ENGINEERS	2	3	0.8143	0.130669	5.07461	0	0	NA	--	--
423	TECHNICAL SALES WORKERS & SERVICE ADVISORS	14	17	1.1009	0.528754	2.29216	1	0	NA	--	--
4232	TECHNICAL SALES WORKERS, AIRCRAFT	1	0	NA	--	--	0	0	NA	--	--
4233	TECHNICAL SALES WORKERS, AGRICULTURAL EQUIPMENT AND SUPPLIES	1	2	0.5697	0.0498842	6.50722	0	0	NA	--	--
4234	TECHNICAL SALES WORKERS, ELECTRONIC EQUIPMENT	0	5	NA	--	--	0	0	NA	--	--
4235	TECHNICAL SALES WORKERS, INDUSTRIAL MACHINERY/EQUIPMENT/SUPPLIES	6	6	1.2424	0.389161	3.96667	0	0	NA	--	--
4236	TECHNICAL SALES WORKERS, MEDICAL AND DENTAL EQUIPMENT/SUPPLIES	3	0	NA	--	--	1	0	NA	--	--
4237	TECHNICAL SALES WORKERS, CHEMICALS AND CHEMICAL PRODUCTS	3	3	1.392	0.270492	7.16396	0	0	NA	--	--
4239	TECHNICAL SALES WORKERS, NEC	0	3	NA	--	--	0	0	NA	--	--
424	SALES REPRESENTATIVES	37	51	0.8501	0.53873	1.34171	2	3	0.6706	0.0821092	5.47758
4242	SALES REPRESENTATIVES, COMMERCIAL AND INDUSTRIAL EQUIPMENT/SUPPLIES	14	16	1.0673	0.498435	2.28582	1	0	NA	--	--
4243	SALES REPRESENTATIVES, GARMENTS AND RELATED TEXTILE PROUCTS	6	2	4.5368	0.898501	22.9078	0	1	NA	--	--
4244	SALES REPRESENTATIVES, MOTOR VEHICLES AND SUPPLIES	0	6	NA	--	--	0	0	NA	--	--
4245	SALES REPRESENTATIVES, PULP, PAPER, AND PAPER PRODUCTS	0	4	NA	--	--	0	0	NA	--	--
4246	SALES REPRESENTATIVES, FARM PRODUCTS AND LIVESTOCK	0	4	NA	--	--	0	0	NA	--	--
4249	SALES REPRESENTATIVES, NEC	24	23	1.2061	0.656121	2.21728	1	2	0.2358	0.0167079	3.33049
43	SALES OCCUPATIONS, RETAIL	114	125	1.1121	0.833341	1.48433	74	115	1.0107	0.688735	1.48319
434-435	SALESPERSONS, COMMODITIES	47	54	0.9944	0.650113	1.52129	18	34	1.0498	0.551652	1.99816
4342	SALESPERSONS, MOTOR VEHICLES, MOBILE HOMES, AND SUPPLIES	14	17	1.0926	0.520698	2.29271	1	1	1.131	0.0561997	22.761
4344	SALESPERSONS, BOATS AND MARINE EQUIPMENT AND SUPPLIES	2	1	1.5595	0.12685	19.1742	0	0	NA	--	--
4345	SALESPERSONS, SPORTING GOODS	2	0	NA	--	--	0	0	NA	--	--
4346	SALESPERSONS, GARMENTS AND TEXTILE PRODUCTS	4	7	0.7839	0.215822	2.84754	7	12	1.2321	0.44972	3.37609
4347	SALESPERSONS, BOOKS, STAMPS, COINS, AND STATIONERY	1	0	NA	--	--	1	3	1.9254	0.18315	20.242
4348	SALESPERSONS, FURNITURE AND HOME FURNISHINGS	3	4	0.8647	0.1696	4.40886	0	2	NA	--	--
4351	SALESPERSONS, SHOES	5	3	1.8475	0.396747	8.60339	2	3	1.5235	0.225509	10.2937
4352	SALESPERSONS, RADIO/TV/HIGH FIDELITY/HOUSEHOLD APPLIANCES	5	2	3.8423	0.706478	20.8971	0	2	NA	--	--
4353	SALESPERSONS, HARDWARE (a)	8	6	1.244	0.412799	3.74926	0	0	NA	--	--
4354	SALESPERSONS, COSMETICS, TOILETRIES, AND ALLIED PRODUCTS	2	1	3.8134	0.29228	49.7561	2	0	NA	--	--
4356	SALESPERSONS, JEWELRY AND RELATED PRODUCTS	0	0	NA	--	--	1	3	0.7348	0.060316	8.9519
4359	SALESPERSONS, NEC	7	15	0.4956	0.192172	1.27848	5	13	0.6574	0.217297	1.98926
436	SALES OCCUPATIONS, OTHER	74	79	1.039	0.729946	1.47908	61	95	0.9235	0.614217	1.38879
4362	SALES CLERKS	47	52	1.1369	0.738464	1.75049	30	50	0.9551	0.560149	1.62872
4363	COUNTER CLERKS (b)	4	3	1.0512	0.197964	5.58294	6	4	1.5749	0.379021	6.54455
4364	CASHIERS	13	16	0.7299	0.334707	1.59196	31	43	0.9942	0.577797	1.71075
4365	NEWS VENDORS (a)	5	3	1.5315	0.344187	6.81468	0	0	NA	--	--
4366	STREET VENDORS, DOOR-TO-DOOR SALES WORKERS, AND RELATED OCCUPATIONS	7	8	1.0287	0.348931	3.0329	1	9	0.1607	0.0185379	1.39394
4367	SALESPERSONS, PARTS	2	1	0.9174	0.0782246	10.7609	0	0	NA	--	--
44	SALES RELATED OCCUPATIONS	8	7	1.2227	0.418921	3.56915	1	4	0.2689	0.0273983	2.64089
445	DEMONSTRATORS, PROMOTERS, & MODELS	1	1	0.9956	0.0609243	16.2708	0	2	NA	--	--
446	SHOPPERS	1	0	NA	--	--	0	0	NA	--	--
449	SALES OCCUPATIONS, OTHER, NEC	6	6	1.0011	0.301097	3.32851	1	2	0.6592	0.0481554	9.02432
45	SUPERVISORS, ADMINISTRATIVE SUPPORT OCCUPATIONS, INCLUDING CLERICAL	22	20	1.8646	0.967407	3.59388	9	10	1.2093	0.447193	3.27056
451	SUPERVISORS, GENERAL OFFICE OCCUPATIONS & COMPUTER EQUIPMENT OPERATORS	8	6	2.1336	0.700842	6.49571	2	5	0.6737	0.104806	4.33161
4511	SUPERVISORS, GENERAL OFFICE OCCUPATIONS (a)	7	5	2.3687	0.707203	7.93371	1	1	1.0435	0.031977	34.0586
4512	SUPERVISORS, COMPUTER AND PERIPHERAL EQUIPMENT OPERATORS	0	0	NA	--	--	0	1	NA	--	--
4513	SUPERVISORS, SECRETARIES, STENOGRAPHERS AND TYPISTS	0	0	NA	--	--	1	0	NA	--	--
4516	SUPERVISORS, CORRESPONDENCE CLERKS AND ORDER CLERKS	1	1	1.165	0.0675155	20.1026	0	2	NA	--	--
4519	SUPERVISORS, RECORD CLERKS	0	0	NA	--	--	0	1	NA	--	--
452	SUPERVISORS, FINANCIAL RECORD PROCESSING/COMMUNICATIONS/MAIL	14	14	1.166	0.523233	2.59875	7	6	1.4623	0.448519	4.76793
4521	SUPERVISORS, FINANICAL RECORD PROCESSING OCCUPATIONS (b)	2	2	2.8476	0.349403	23.2084	4	2	3.0643	0.507907	18.4877
4522	SUPERVISORS, DUPLICATING, MAIL AND OTHER OFFICE MACHINE OPERATORS	0	1	NA	--	--	0	0	NA	--	--
4523	CHIEF COMMUNICATIONS OPERATORS	1	1	0.5574	0.0337307	9.21267	2	2	1.3025	0.13738	12.3499
4524	SUPERVISORS, MAIL AND MESSAGE DISTRIBUTION CLERKS	3	2	1.0822	0.167604	6.98886	0	1	NA	--	--
4525	SUPERVISORS, MATERIAL RECORDING, SCHEDULING, AND DISTRIBUTION CLERKS (a)	8	6	1.5407	0.506965	4.68269	0	0	NA	--	--
4528	SUPERVISORS, ADJUSTERS, INVESTIGATORS, AND COLLECTORS	0	1	NA	--	--	1	1	0.8545	0.0505517	14.4468
4529	SUPERVISORS, MISCELLANEOUS ADMINISTRATIVE SUPPORT OCCUPATIONS	0	1	NA	--	--	0	1	NA	--	--
46-47	ADMINISTRATIVE SUPPORT OCCUPATIONS, INCLUDING CLERICAL	209	264	0.937	0.750489	1.16996	124	191	0.6942	0.486143	0.991457
461	COMPUTER & PERIPHERAL EQUIPMENT OPERATORS	4	3	1.5789	0.316997	7.86515	0	5	NA	--	--
4612	COMPUTER OPERATORS	4	3	1.5789	0.316997	7.86515	0	5	NA	--	--
462	SECRETARIES, STENOGRAPHERS & TYPISTS	4	12	0.3269	0.0974118	1.09733	58	66	1.2936	0.838338	1.9963
4622	SECRETARIES	1	3	0.5091	0.0472411	5.48786	50	57	1.3369	0.84626	2.11204
4623	STENOGRAPHERS	1	0	NA	--	--	5	6	1.4295	0.403859	5.06035
4624	TYPISTS	2	9	0.2151	0.0434037	1.06606	9	11	0.9492	0.353421	2.54936
463	GENERAL OFFICE OCCUPATIONS	29	37	0.9075	0.539942	1.52532	27	35	0.9542	0.528655	1.7223
464	INFORMATION CLERKS	13	9	2.6409	1.07735	6.47372	13	30	0.6729	0.315903	1.43375
4642	INTERVIEWING CLERKS (a)	7	3	2.7494	0.6601	11.4518	2	8	0.673	0.126687	3.57546
4643	HOTEL CLERKS	1	4	0.2175	0.0220623	2.14525	2	1	2.2046	0.0649004	74.8898
4644	RESERVATION AGENTS AND TRANSPORTATION TICKET CLERKS (a)	2	1	4.4766	0.388517	51.5828	4	5	0.8369	0.187074	3.7447
4645	RECEPTIONISTS	0	0	NA	--	--	7	17	0.6324	0.234056	1.70911
4649	INFORMATION CLERKS, NEC (a)	3	1	9.8428	0.976181	99.2466	0	1	NA	--	--
466	CORRESPONDENCE CLERKS & ORDER CLERKS	6	8	0.6696	0.211767	2.11742	8	10	0.8303	0.280014	2.46239
4662	CLASSIFIED-AD CLERKS	0	1	NA	--	--	0	1	NA	--	--
4663	CORRESPONDENCE CLERKS	0	0	NA	--	--	0	1	NA	--	--
4664	ORDER CLERKS	6	6	0.8457	0.245227	2.9171	8	8	1.033	0.324748	3.28618
469	RECORD CLERKS	15	17	1.7978	0.860218	3.75747	13	20	0.9552	0.435915	2.09332
4692	PERSONNEL CLERKS, EXCEPT PAYROLL AND TIMEKEEPING	3	7	0.5433	0.132689	2.22506	3	0	NA	--	--
4694	LIBRARY CLERKS	1	1	1.2076	0.0689432	21.1529	3	8	0.6263	0.144816	2.70947
4696	FILE CLERKS (a)	5	4	1.3766	0.342192	5.53818	4	10	0.6399	0.184637	2.2182
4699	RECORDS CLERKS, NEC (a)	7	5	2.2402	0.633706	7.91939	3	3	1.2833	0.223923	7.35495
471	FINANCIAL RECORD PROCESSING OCCUPATIONS	18	35	0.6327	0.34555	1.15864	42	47	2.3626	1.41147	3.95473
4712	BOOKKEEPERS AND ACCOUNTING AND AUDITING CLERKS (b)	11	21	0.7237	0.333495	1.57072	32	37	1.7226	0.984295	3.01481
4713	PAYROLL AND TIMEKEEPING CLERKS	4	12	0.3984	0.125292	1.26735	2	6	0.2657	0.0460673	1.5335
4715	BILLING CLERKS	2	0	NA	--	--	4	5	1.1556	0.258606	5.16467
4716	COST AND RATE CLERKS (b)	1	2	0.746	0.0603255	9.22558	2	0	NA	--	--
4718	BILLING, POSTING, AND CALCULATING MACHINE OPERATORS	3	1	4.2165	0.421277	42.2036	5	8	0.7274	0.212817	2.48676
472	DUPLICATING, MAIL, & OTHER OFFICE MACHINE OPERATORS	1	1	1.1379	0.0676166	19.152	1	3	0.311	0.0269504	3.59064
4722	DUPLICATING MACHINE OPERATORS	0	1	NA	--	--	0	2	NA	--	--
4723	MAIL PREPARING AND HANDLING MACHINE OPERATORS	1	0	NA	--	--	1	0	NA	--	--
4729	OFFICE MACHINE OPERATORS, NEC	0	0	NA	--	--	0	1	NA	--	--
473	COMMUNICATIONS EQUIPMENT OPERATORS	9	3	3.559	0.885659	14.302	10	24	0.4534	0.198695	1.03501
4732	TELEPHONE OPERATORS (a)	6	1	8.2766	0.878699	77.9601	9	22	0.4428	0.186605	1.05103
4733	TELEGRAPHERS	3	2	1.6215	0.256828	10.2375	1	2	0.6199	0.0444928	8.63873
4739	COMMUNICATIONS EQUIPMENT OPERATORS, NEC	0	0	NA	--	--	1	0	NA	--	--
474	MAIL & MESSAGE DISTRIBUTING OCCUPATIONS	44	43	1.2417	0.784434	1.96579	8	7	2.4293	0.79684	7.40654
4742	POSTAL CLERKS, EXCEPT MAIL CARRIERS (a, b))	17	13	1.4891	0.695523	3.18835	4	3	2.0084	0.382627	10.5424
4743	MAIL CARRIERS, POST OFFICE	15	20	1.0316	0.501357	2.12299	2	3	0.6612	0.0794263	5.50495
4744	MAIL CLERKS, EXCEPT POST OFFICE (b)	10	9	1.3015	0.494441	3.42592	3	0	NA	--	--
4745	MESSENGERS	4	6	0.5607	0.141726	2.21896	0	1	NA	--	--
475	MATERIAL RECORDING, SCHEDULING, & DISTRIBUTING CLERKS	97	120	0.8806	0.650432	1.19245	8	17	0.8587	0.339737	2.17055
4751	DISPATCHERS	12	11	1.0394	0.435829	2.47917	1	1	2.8743	0.0989813	83.4692
4752	PRODUCTION AND PLANNING CLERKS	12	9	1.2601	0.493768	3.21609	1	1	5.096	0.260317	99.7613
4753	TRAFFIC, SHIPPING, AND RECEIVING CLERKS	18	26	0.717	0.375901	1.36773	1	2	0.8212	0.0727802	9.26773
4754	STOCK AND INVENTORY CLERKS	61	72	0.9772	0.669648	1.42604	5	11	0.7244	0.227112	2.31096
4755	METER READERS	0	5	NA	--	--	0	0	NA	--	--
4756	WEIGHERS, MEASURERS, AND CHECKERS	1	0	NA	--	--	0	0	NA	--	--
4757	SAMPLERS	0	2	NA	--	--	0	1	NA	--	--
4758	EXPEDITERS	1	2	0.4239	0.0359554	4.99775	0	1	NA	--	--
4759	MATERIAL RECORDING, SCHEDULING, AND DISTRIBUTING CLERKS, NEC	0	1	NA	--	--	0	0	NA	--	--
478	ADJUSTERS, INVESTIGATORS, & COLLECTORS	13	16	1.4751	0.682848	3.18666	9	6	2.406	0.795049	7.28112
4782	INSURANCE ADJUSTERS, EXAMINERS, AND INVESTIGATORS (a)	7	5	2.0611	0.613282	6.9271	0	4	NA	--	--
4783	INVESTIGATORS AND ADJUSTERS, EXCEPT INSURANCE (a, b)	6	5	1.9064	0.543167	6.69117	5	1	3.7523	0.420376	33.4948
4784	CLERKS, SOCIAL WELFARE	0	2	NA	--	--	0	1	NA	--	--
4786	BILL AND ACCOUNT COLLECTORS (b)	1	5	0.2184	0.0240438	1.98533	5	1	4.442	0.505937	39.0008
479	MISCELLANEOUS ADMINISTRATIVE SUPPORT OCCUPATIONS, INCLUDING CLERICAL	11	14	0.9862	0.426636	2.27994	17	46	0.4487	0.237727	0.846907
4791	BANK TELLERS	6	6	1.3556	0.412849	4.45179	9	18	0.5109	0.212625	1.22772
4792	PROOF READERS	2	1	1.7387	0.119755	25.2445	0	3	NA	--	--
4793	DATA ENTRY KEYERS	0	1	NA	--	--	1	13	0.0668	0.00776786	0.575376
4794	STATISTICAL CLERKS	0	1	NA	--	--	2	2	0.8854	0.113416	6.91341
4795	TEACHERS AIDES	1	1	0.6757	0.0416511	10.9646	4	11	0.8581	0.245115	3.00472
4799	ADMINISTRATIVE SUPPORT OCCUPATIONS, INCLUDING CLERICAL, NEC	0	4	NA	--	--	2	1	2.9881	0.219689	40.6442
50	PRIVATE HOUSEHOLD OCCUPATIONS	1	4	0.3595	0.0392644	3.29331	15	16	2.7004	1.19845	6.08493
502	DAY WORKERS	0	0	NA	--	--	2	6	0.7986	0.132715	4.80602
504	COOKS, PRIVATE HOUSEHOLD (b)	0	0	NA	--	--	1	0	NA	--	--
505	HOUSEKEEPERS & BUTLERS	0	0	NA	--	--	0	1	NA	--	--
506	CHILD CARE WORKERS, PRIVATE HOUSEHOLD	0	1	NA	--	--	5	7	1.4864	0.420215	5.25777
507	PRIVATE HOUSEHOLD CLEANERS & SERVANTS (b)	0	1	NA	--	--	5	2	3.825	0.670119	21.833
509	PRIVATE HOUSEHOLD OCCUPATIONS, NEC (b)	1	2	0.7083	0.0614564	8.16441	2	2	1.5075	0.190909	11.9039
51	PROTECTIVE SERVICE OCCUPATIONS	71	83	0.941	0.661627	1.33841	4	5	1.316	0.29484	5.87398
511	SUPERVISORS	3	6	0.5863	0.131821	2.60772	0	0	NA	--	--
5111	SUPERVISORS, FIREFIGHTING AND FIRE PREVENTION OCCUPATIONS	2	0	NA	--	--	0	0	NA	--	--
5112	SUPERVISORS, POLICE AND DETECTIVES	1	6	0.1795	0.0193126	1.66981	0	0	NA	--	--
512	FIREFIGHTING & FIRE PREVENTION OCCUPATIONS	15	24	0.7408	0.369956	1.48359	0	0	NA	--	--
5122	FIRE INSPECTION AND FIRE PREVENTION OCCUPATIONS	2	3	0.7559	0.120598	4.73884	0	0	NA	--	--
5123	FIREFIGHTING OCCUPATIONS	13	21	0.7255	0.343424	1.53305	0	0	NA	--	--
513	POLICE AND DETECTIVES	31	36	0.9095	0.541776	1.52685	2	2	1.2157	0.141243	10.4645
5132	POLICE AND DETECTIVES, PUBLIC SERVICE	24	31	0.8461	0.477276	1.50011	1	1	1.1335	0.0657045	19.5561
5133	CORRECTIONAL INSTITUTION OFFICERS	5	2	2.2102	0.40352	12.1067	1	1	1.3304	0.0506643	34.9353
5134	SHERIFFS, BAILIFFS, AND OTHER LAW ENFORCEMENT OFFICERS	3	3	0.8903	0.150904	5.25342	1	0	NA	--	--
514	GUARDS	34	32	1.0812	0.637819	1.83281	3	3	1.7408	0.263038	11.522
5142	CROSSING GUARDS	2	0	NA	--	--	0	1	NA	--	--
5144	GUARDS AND POLICE, EXCEPT PUBLIC SERVICE	30	29	0.9881	0.567229	1.72142	1	2	0.5024	0.0416377	6.06419
5149	PROTECTIVE SERVICE OCCUPATIONS, NEC	4	3	2.0156	0.39495	10.2865	2	0	NA	--	--
52	SERVICE OCCUPATIONS, EXCEPT PRIVATE HOUSEHOLD & PROTECTIVE	216	203	1.5202	1.20148	1.9235	125	152	1.6149	1.11401	2.34103
521	FOOD & BEVERAGE PREPARATION & SERVICE OCCUPATIONS	105	99	1.3571	0.991556	1.85756	69	101	0.8591	0.568985	1.29724
5211	SUPERVISORS, FOOD/BEVERAGE PREPARATION AND SERVICE OCCUPATIONS	7	13	0.6645	0.245029	1.80214	3	9	0.2717	0.0627411	1.17676
5212	BARTENDERS	6	10	0.7439	0.247062	2.24034	3	1	3.8727	0.361028	41.5423
5213	WAITERS AND WAITRESSES	5	10	0.5483	0.176134	1.7069	32	52	0.7424	0.432555	1.2743
5214	COOKS, EXCEPT SHORT ORDER	31	36	0.9112	0.541086	1.53449	13	18	0.8231	0.356912	1.89849
5215	SHORT-ORDER COOKS (a)	15	10	1.5676	0.665079	3.69486	3	6	0.6806	0.139251	3.32712
5216	FOOD COUNTER, FOUNTAIN AND RELATED OCCUPATIONS (a)	11	7	2.6429	0.965169	7.23747	12	18	0.901	0.391847	2.07204
5217	KITCHEN WORKERS, FOOD PREPARATION	9	7	1.1115	0.39034	3.16502	7	12	0.8277	0.286699	2.3896
5218	WAITERS/WAITRESSES ASSISTANTS (a)	6	4	1.9011	0.476969	7.57816	2	3	0.4282	0.0566886	3.23535
5219	MISCELLANEOUS FOOD AND BEVERAGE PREPARATION OCCUPATIONS	24	21	1.4103	0.747521	2.66084	6	6	1.4886	0.436532	5.07687
523	HEALTH SERVICE OCCUPATIONS	29	29	1.3066	0.744633	2.29286	38	36	2.5091	1.44456	4.35819
5232	DENTAL ASSISTANTS	1	1	1.1112	0.0326055	37.8699	2	5	0.7488	0.128398	4.36733
5233	HEALTH AIDES, EXCEPT NURSING (b)	11	12	1.3835	0.567076	3.37544	7	3	4.3543	0.953842	19.8776
5236	NURSING AIDES, ORDERLIES, AND ATTENDANTS (b)	18	18	1.2486	0.618958	2.51912	30	29	1.6721	0.925201	3.02196
524	CLEANING & BUILDING SERVICE OCCUPATIONS, EXCEPT PRIVATE HOUSEHOLD	82	65	1.8252	1.27041	2.62251	28	19	3.6618	1.83501	7.30721
5241	SUPERVISORS, CLEANING AND BUILDING SERVICE WORKERS	9	8	0.8801	0.318814	2.42961	3	5	0.9362	0.180453	4.85713
5242	MAIDS AND HOUSEMEN (a, b)	2	1	1.4969	0.116469	19.2391	17	10	2.5004	1.0188	6.13691
5244	JANITORS AND CLEANERS (a, b)	70	52	1.4265	0.959607	2.12082	11	7	2.6819	0.896321	8.02489
5245	ELEVATOR OPERATORS	1	0	NA	--	--	0	1	NA	--	--
5246	PEST CONTROL OCCUPATIONS	1	1	1.0457	0.0611476	17.8831	0	0	NA	--	--
5249	CLEANING AND BUILDING SERVICE OCCUPATIONS, NEC	4	5	0.4972	0.128712	1.92112	0	0	NA	--	--
525-526	PERSONAL SERVICE OCCUPATIONS	37	27	1.617	0.943515	2.77149	26	45	0.7862	0.441974	1.39865
5251	SUPERVISORS, PERSONAL SERVICE OCCUPATIONS	1	2	0.4167	0.0303435	5.72318	1	3	1.2551	0.11705	13.4598
5252	BARBERS	1	3	0.4906	0.0469759	5.12381	0	0	NA	--	--
5253	HAIRDRESSERS AND COSMETOLOGISTS	1	1	1.6216	0.100498	26.1668	7	10	1.7234	0.564769	5.25933
5254	ATTENDANTS, AMUSEMENT AND RECREATION FACILITIES	16	14	1.4303	0.668597	3.05979	0	2	NA	--	--
5255	GUIDES (a)	2	1	1.9489	0.164351	23.1118	3	2	4.1208	0.551439	30.7941
5256	USHERS (a)	4	1	4.1008	0.419619	40.0776	0	1	NA	--	--
5257	PUBLIC TRANSPORTATION ATTENDANTS	0	0	NA	--	--	0	1	NA	--	--
5262	BAGGAGE PORTERS AND BELLHOPS (a)	7	2	2.9841	0.526337	16.9191	0	1	NA	--	--
5263	WELFARE SERVICE AIDES	0	2	NA	--	--	6	8	0.6004	0.182645	1.97389
5264	CHILD CARE WORKERS, EXCEPT PRIVATE HOUSEHOLD (a)	2	0	NA	--	--	9	18	0.6611	0.274683	1.59139
5269	PERSONAL SERVICE OCCUPATIONS, NEC (a)	4	3	3.073	0.603596	15.6461	3	2	1.8322	0.22542	14.8928
55	FARM OPERATORS & MANAGERS	22	39	0.7793	0.442752	1.37196	5	3	1.6446	0.318338	8.4973
551	FARMERS (WORKING PROPRIETORS)	20	37	0.7627	0.423831	1.37282	5	2	2.5927	0.398014	16.8895
5512	GENERAL FARMERS	5	9	0.9042	0.282538	2.89371	1	1	0.7646	0.0318237	18.3725
5513	CROP, VEGETABLE, FRUIT AND TREE NUT FARMERS	0	6	NA	--	--	2	0	NA	--	--
5514	LIVESTOCK, DAIRY AND POULTRY FARMERS	14	23	0.7731	0.378998	1.57716	2	1	3.1783	0.203878	49.5502
5515	HORTICULTURAL SPECIALTY FARMERS	1	0	NA	--	--	0	0	NA	--	--
552	FARM MANAGERS	4	3	1.5516	0.301542	7.98399	0	1	NA	--	--
5522	MANAGERS, GENERAL FARMS	2	0	NA	--	--	0	0	NA	--	--
5523	MANAGERS, CROP, VEGETABLE, FRUIT AND TREE NUT FARMS	1	1	2.5987	0.134019	50.3938	0	0	NA	--	--
5524	MANAGERS, LIVESTOCK, DAIRY, POULTRY AND FISH FARMS	0	2	NA	--	--	0	1	NA	--	--
5525	MANAGERS, HORTICULTURAL SPECIALTY FARMS	1	0	NA	--	--	0	0	NA	--	--
56	OTHER AGRICULTURAL & RELATED OCCUPATIONS	122	172	0.8078	0.615484	1.06023	10	13	1.0645	0.410567	2.76006
561	FARM OCCUPATIONS, EXCEPT MANAGERIAL	92	126	0.834	0.612474	1.13586	7	11	0.9435	0.318183	2.79799
5611	SUPERVISORS, FARM WORKERS	1	2	0.6441	0.054102	7.66943	0	0	NA	--	--
5612	GENERAL FARM WORKERS	28	56	0.5821	0.354586	0.955656	1	3	0.4786	0.0446548	5.13112
5613	FIELD CROP AND VEGETABLE FARM WORKERS (HAND)	5	12	0.6899	0.228841	2.08014	3	1	18.146	1.61955	203.333
5614	ORCHARD AND VINEYARD AND RELATED WORKERS (HAND)	5	2	1.8069	0.295755	11.0397	0	0	NA	--	--
5616	FARM MACHINERY OPERATORS	10	9	1.2113	0.456046	3.21755	0	1	NA	--	--
5617	LIVESTOCK WORKERS	43	56	0.8904	0.57301	1.38366	3	5	0.5991	0.12014	2.98845
5618	MARINE LIFE CULTIVATION WORKERS	2	0	NA	--	--	0	1	NA	--	--
5619	NURSERY WORKERS	4	3	2.6131	0.537171	12.7125	0	1	NA	--	--
562	RELATED AGRICULTURAL OCCUPATIONS	38	54	0.8774	0.555932	1.38483	3	2	1.5785	0.214889	11.5957
5621	SUPERVISORS, RELATED AGRICULTURAL WORKERS	7	6	1.6243	0.500729	5.26938	0	0	NA	--	--
5622	GROUNDSKEEPERS AND GARDENERS, EXCEPT FARM	31	45	0.8372	0.507506	1.38117	2	1	1.0251	0.0877103	11.9824
5624	ANIMAL CARETAKERS, EXCEPT FARM	1	0	NA	--	--	0	1	NA	--	--
5625	GRADERS AND SORTERS, AGRICULTURAL PRODUCTS	0	0	NA	--	--	1	0	NA	--	--
5627	INSPECTORS, AGRICULTURAL PRODUCTS	0	3	NA	--	--	0	0	NA	--	--
57	FORESTRY & LOGGING OCCUPATIONS	38	52	0.9258	0.585073	1.4652	0	1	NA	--	--
571	SUPERVISORS	2	4	1.1251	0.19636	6.44725	0	0	NA	--	--
572	FORESTRY WORKERS, EXCEPT LOGGING	0	1	NA	--	--	0	1	NA	--	--
573	TIMBER CUTTING & RELATED OCCUPATIONS	31	43	0.8421	0.509531	1.39188	0	0	NA	--	--
579	LOGGING OCCUPATIONS, NEC	7	5	2.0527	0.610631	6.90097	0	0	NA	--	--
58	FISHERS, HUNTERS, & TRAPPERS	17	11	2.0678	0.907084	4.71384	0	1	NA	--	--
583	FISHERS (a)	17	11	2.0678	0.907084	4.71384	0	1	NA	--	--
60	SUPERVISORS, MECHANICS & REPAIRERS	39	42	0.7754	0.481578	1.24877	0	2	NA	--	--
61	MECHANICS & REPAIRERS	217	212	1.3015	1.03511	1.63667	2	4	0.8596	0.120379	6.13949
611	VEHICLE & MOBILE EQUIPMENT MECHANICS & REPAIRERS	119	110	1.5237	1.13322	2.04881	1	1	1.1341	0.0565769	22.7369
6111	AUTOMOBILE MECHANICS (a)	59	46	1.5996	1.04971	2.43777	0	0	NA	--	--
6112	BUS AND TRUCK ENGINE, AND DIESEL ENGINE MECHANICS	18	22	0.6683	0.340594	1.31158	0	0	NA	--	--
6113	AIRCRAFT ENGINE MECHANICS	8	10	0.6643	0.24342	1.81305	0	0	NA	--	--
6114	SMALL ENGINE REPAIRERS	1	3	0.3055	0.0309056	3.02116	0	0	NA	--	--
6115	AUTOMOBILE BODY AND RELATED REPAIRERS	13	15	0.9551	0.423593	2.15365	0	1	NA	--	--
6116	AIRCRAFT MECHANICS (EXCEPT ENGINE SPECIALISTS)	24	20	1.3919	0.737728	2.62618	1	0	NA	--	--
6117	HEAVY EQUIPMENT MECHANICS (a)	5	5	1.1342	0.29217	4.40306	0	0	NA	--	--
6118	FARM EQUIPMENT MECHANICS	2	1	1.6107	0.131098	19.7905	0	0	NA	--	--
613	INDUSTRIAL MACHINERY REPAIRERS	34	30	1.1913	0.703093	2.01859	0	0	NA	--	--
614	MACHINERY MAINTENANCE OCCUPATIONS	4	7	0.4954	0.131701	1.8637	0	1	NA	--	--
615	ELECTRICAL & ELECTRONIC EQUIPMENT REPAIRERS	58	49	1.5424	1.01637	2.34069	0	1	NA	--	--
6151	COMMUNICATIONS EQUIPMENT REPAIRERS	16	14	1.4029	0.645158	3.05075	0	1	NA	--	--
6152	ELECTRIC MOTOR,TRANSFORMER, AND RELATED REPAIRERS	0	4	NA	--	--	0	0	NA	--	--
6153	ELECTRICAL/ELECTRONIC REPAIRERS, COMMERCIAL/INDUSTRIAL EQUIPMENT	13	14	0.7856	0.350691	1.76029	0	0	NA	--	--
6154	DATA PROCESSING EQUIPMENT REPAIRERS	5	2	3.9213	0.718268	21.4089	0	0	NA	--	--
6155	ELECTRONIC REPAIRERS, HOME-ENTERTAINMENT EQUIPMENT (a)	10	6	1.624	0.564861	4.66948	0	0	NA	--	--
6156	HOUSEHOLD APPLIANCE AND POWER TOOL REPAIRERS	5	4	1.3446	0.322915	5.59913	0	0	NA	--	--
6157	TELEPHONE LINE INSTALLERS AND REPAIRERS (a)	14	8	2.1527	0.847078	5.47082	0	0	NA	--	--
6158	TELEPHONE INSTALLERS AND REPAIRERS	5	6	0.7011	0.198933	2.47129	0	0	NA	--	--
6159	MISCELLANEOUS ELECTRICAL AND ELECTRONIC EQUIPMENT REPAIRERS	4	1	4.2678	0.442181	41.1929	0	0	NA	--	--
616	HEATING, AIR-CONDITIONING, & REFRIGERATION MECHANICS	8	5	1.2915	0.388178	4.29708	0	0	NA	--	--
617	MISCELLANEOUS MECHANICS & REPAIRERS	32	38	0.6966	0.417254	1.16308	1	1	1.3605	0.0504321	36.7046
6171	CAMERA, WATCH, AND OTHER PRECISION INSTRUMENT REPAIRERS	1	0	NA	--	--	0	0	NA	--	--
6172	MUSICAL INSTRUMENT REPAIRERS AND TUNERS	2	0	NA	--	--	0	0	NA	--	--
6173	LOCKSMITHS AND SAFE REPAIRERS	0	1	NA	--	--	0	0	NA	--	--
6174	OFFICE MACHINE REPAIRERS	1	5	0.1132	0.0112374	1.14142	1	0	NA	--	--
6178	MILLWRIGHTS	3	4	0.782	0.156887	3.89867	0	0	NA	--	--
6179	MECHANICS AND REPAIRERS, NEC	25	26	0.7971	0.440106	1.44376	0	1	NA	--	--
63	SUPERVISORS, CONSTRUCTION & EXTRACTIVE OCCUPATIONS	36	43	0.8673	0.537069	1.40079	0	0	NA	--	--
631	SUPERVISORS, CONSTRUCTION	35	40	0.9322	0.570166	1.52423	0	0	NA	--	--
6311	SUPERVISORS, OVERALL CONSTRUCTION	9	12	0.7494	0.297907	1.88553	0	0	NA	--	--
6312	SUPERVISORS, BRICKMASONS, STONEMASONS, HARD TILE SETTERS	1	0	NA	--	--	0	0	NA	--	--
6313	SUPERVISORS, CARPENTERS AND RELATED WORKERS	5	14	0.3835	0.130165	1.13028	0	0	NA	--	--
6314	SUPERVISORS, ELECTRICIANS AND POWER TRANSMISSION INSTALLERS	1	4	0.2975	0.0306036	2.89345	0	0	NA	--	--
6315	SUPERVISORS, PAINTERS, PAPERHANGERS, AND PLASTERERS	2	0	NA	--	--	0	0	NA	--	--
6316	SUPERVISORS, PLUMBERS AND PIPEFITTERS AND STEAMFITTERS	6	1	3.2892	0.389224	27.7963	0	0	NA	--	--
6318	SUPERVISORS, OTHER CONSTRUCTION TRADES (a)	9	6	1.7859	0.592505	5.38322	0	0	NA	--	--
632	SUPERVISORS, EXTRACTIVE OCCUPATIONS	0	1	NA	--	--	0	0	NA	--	--
64	CONSTRUCTION TRADES	186	204	1.0596	0.834353	1.34588	5	1	8.748	0.771512	99.1929
641	BRICKMASONS, STONEMASONS, & HARD TILE SETTERS	13	8	2.1965	0.860328	5.60792	0	0	NA	--	--
6412	BRICKMASONS	7	7	1.296	0.419626	4.00281	0	0	NA	--	--
6413	STONEMASONS (a)	1	0	NA	--	--	0	0	NA	--	--
6414	TILE SETTERS, HARD (a)	3	0	NA	--	--	0	0	NA	--	--
642	CARPENTERS & RELATED WORKERS	69	91	0.7509	0.52732	1.06937	2	0	NA	--	--
6422	CARPENTERS	67	88	0.7585	0.52978	1.08605	2	0	NA	--	--
6424	DRYWALL INSTALLERS	3	1	3.0018	0.296146	30.4273	0	0	NA	--	--
643	ELECTRICIANS & POWER TRANSMISSION INSTALLERS	22	27	0.8876	0.488907	1.61177	0	0	NA	--	--
6432	ELECTRICIANS	19	20	1.0725	0.553723	2.07742	0	0	NA	--	--
6433	ELECTRICAL POWER INSTALLERS AND REPAIRERS	3	7	0.3793	0.0926408	1.55357	0	0	NA	--	--
644	PAINTERS, PAPERHANGERS, & PLASTERERS	21	22	1.1787	0.608489	2.28337	1	0	NA	--	--
6442	PAINTERS (CONSTRUCTION AND MAINTENANCE)	19	21	1.0418	0.526315	2.06239	1	0	NA	--	--
6444	PLASTERERS	1	1	1.9109	0.100775	36.2358	0	0	NA	--	--
645	PLUMBERS, PIPEFITTERS & STEAMFITTERS (a)	33	25	1.4512	0.830198	2.53688	0	0	NA	--	--
646-647	OTHER CONSTRUCTION TRADES	51	50	1.0854	0.706226	1.66825	2	1	1.6797	0.1395	20.2267
6462	CARPET AND SOFT TILE INSTALLERS	2	3	0.5396	0.0779087	3.73773	0	0	NA	--	--
6463	CONCRETE AND TERRAZZO FINISHERS	4	8	0.4955	0.138695	1.77031	0	0	NA	--	--
6464	GLAZIERS	1	5	0.1854	0.0206279	1.6665	1	1	0.7882	0.0406084	15.3022
6465	INSULATION WORKERS	4	0	NA	--	--	0	0	NA	--	--
6466	PAVING, SURFACING, AND TAMPING EQUIPMENT OPERATORS	6	6	1.2671	0.388508	4.13288	1	0	NA	--	--
6467	RAIL AND TRACK LAYING EQUIPMENT OPERATORS	5	2	1.9447	0.31427	12.0341	0	0	NA	--	--
6468	ROOFERS	2	3	0.5117	0.0780243	3.35621	0	0	NA	--	--
6472	SHEETMETAL DUCT INSTALLERS	0	2	NA	--	--	0	0	NA	--	--
6473	STRUCTURAL METAL WORKERS	4	5	0.7176	0.177063	2.90873	0	0	NA	--	--
6474	DRILLERS, EARTH	3	1	1.9179	0.179065	20.5425	0	0	NA	--	--
6475	AIR HAMMER OPERATORS	1	1	1.0194	0.060174	17.2713	0	0	NA	--	--
6479	CONSTRUCTION TRADES, NEC	21	17	1.7352	0.873788	3.44609	0	0	NA	--	--
65	EXTRACTIVE OCCUPATIONS	2	6	0.2075	0.0398485	1.08138	0	0	NA	--	--
654	MINING MACHINE OPERATORS	2	1	1.4774	0.118236	18.4631	0	0	NA	--	--
656	EXTRACTIVE OCCUPATIONS, NEC	0	5	NA	--	--	0	0	NA	--	--
67	SUPERVISORS, PRECISION PRODUCTION OCCUPATIONS	11	9	1.4534	0.561268	3.76376	0	1	NA	--	--
68	PRECISION PRODUCTION OCCUPATIONS	112	112	1.2685	0.943162	1.70613	16	20	0.8008	0.376145	1.70498
681-682	PRECISION METAL WORKERS	53	37	2.1592	1.36732	3.41001	0	2	NA	--	--
6811	TOOL AND DIE MAKERS	6	10	0.7782	0.266561	2.27238	0	0	NA	--	--
6812	PRECISION ASSEMBLERS (METAL)	1	1	1.2303	0.0709146	21.3464	0	0	NA	--	--
6813	MACHINISTS (a)	23	17	1.5932	0.814221	3.11747	0	1	NA	--	--
6814	BOILERMAKERS	2	2	1.3217	0.133532	13.0822	0	0	NA	--	--
6816	PRECISION GRINDERS, FITTERS, AND TOOL SHARPENERS (a)	5	2	3.0513	0.569004	16.3634	0	1	NA	--	--
6817	PATTERNMAKERS AND MODEL MAKERS (METAL)	1	1	1.0484	0.0613317	17.9229	0	0	NA	--	--
6821	LAY-OUT WORKERS (a)	6	1	10.774	1.1992	96.8135	0	0	NA	--	--
6822	PRECISION HAND MOLDERS AND SHAPERS (JEWELERS)	0	1	NA	--	--	0	0	NA	--	--
6823	ENGRAVERS (a)	0	0	NA	--	--	0	0	NA	--	--
6824	SHEET METAL WORKERS (a)	8	3	4.1386	1.01707	16.8409	0	0	NA	--	--
6829	MISCELLANEOUS PRECISION METAL WORKERS (a)	3	1	1.8619	0.185826	18.6566	0	0	NA	--	--
683	PRECISION WOODWORKERS	7	12	0.6512	0.243701	1.74036	0	1	NA	--	--
6831	PATTERNMAKERS AND MODEL MAKERS, WOOD (a)	0	2	NA	--	--	0	0	NA	--	--
6832	CABINET MAKERS AND BENCH CARPENTERS	5	6	1.0729	0.307747	3.74059	0	0	NA	--	--
6835	FURNITURE FINISHERS	0	3	NA	--	--	0	0	NA	--	--
6839	MISCELLANEOUS PRECISION WOODWORKERS	1	0	NA	--	--	0	1	NA	--	--
684	PRECISION PRINTING OCCUPATIONS	3	3	1.2884	0.233447	7.11129	1	0	NA	--	--
6841	PRECISION TYPESETTERS	1	1	0.9694	0.0526608	17.8462	0	0	NA	--	--
6842	PRECISION LITHOGRAPHERS AND PHOTOENGRAVERS	1	1	1.8191	0.0817089	40.5033	0	0	NA	--	--
6844	BOOKBINDERS	1	1	1.2648	0.0737163	21.7038	1	0	NA	--	--
685	PRECISION TEXTILE, APPAREL & FURNISHINGS WORKERS	6	6	0.8285	0.249679	2.74937	5	7	0.7268	0.202593	2.60761
6852	TAILORS AND DRESSMAKERS, HAND	0	1	NA	--	--	1	0	NA	--	--
6853	UPHOLSTERERS	2	1	2.4658	0.212543	28.6076	0	0	NA	--	--
6854	SHOEMAKERS AND LEATHER WORKERS AND REPAIRERS	3	2	1.1749	0.169015	8.1681	2	5	0.3986	0.0697151	2.27942
6855	PRECISION LAUNDERING, CLEANING, AND DYEING OCCUPATIONS	0	1	NA	--	--	0	0	NA	--	--
6859	MISCELLANEOUS PRECISION APPAREL AND FABRIC WORKERS	1	1	0.6167	0.0379883	10.0137	2	1	1.7238	0.107064	27.7556
686	PRECISION WORKERS, ASSORTED MATERIALS	14	19	0.7035	0.335116	1.47694	7	6	1.4358	0.43384	4.75185
6861	PRECISION HAND MOLDERS AND SHAPERS	4	0	NA	--	--	1	0	NA	--	--
6862	PRECISION PATTERNMAKERS, LAY-OUT WORKERS AND CUTTERS	2	6	0.3738	0.0677613	2.06231	0	0	NA	--	--
6863	DETAIL DESIGN PAINTERS AND DECORATORS	1	2	0.6443	0.0545383	7.61189	1	3	0.4622	0.0426515	5.01087
6864	OPTICAL GOODS WORKERS	2	1	3.2375	0.254853	41.1295	1	0	NA	--	--
6865	DENTAL LABORATORY AND MEDICAL APPLIANCE TECHNICIANS	2	4	0.3756	0.058809	2.39995	0	0	NA	--	--
6866	GEM AND DIAMOND WORKING OCCUPATIONS	0	0	NA	--	--	1	0	NA	--	--
6867	PRECISION ELECTRICAL AND ELECTRONIC EQUIPMENT ASSEMBLERS	2	3	0.3689	0.0600556	2.26622	4	2	1.7598	0.287534	10.771
6868	PHOTOGRAPHIC PROCESS WORKERS	1	1	0.4902	0.0286845	8.37826	0	1	NA	--	--
6869	MISCELLANEOUS PRECISION WORKERS, NEC	0	2	NA	--	--	0	1	NA	--	--
687	PRECISION FOOD PRODUCTION OCCUPATIONS	15	24	0.6788	0.335883	1.37205	2	0	NA	--	--
6871	BUTCHERS AND MEAT CUTTERS	11	14	0.8523	0.365677	1.98689	0	0	NA	--	--
6872	BAKERS	3	8	0.3808	0.0872244	1.66332	0	0	NA	--	--
6873	BATCHMAKERS (CANDYMAKERS, CHEESEMAKERS, ETC)	0	2	NA	--	--	0	0	NA	--	--
6879	MISCELLANEOUS PRECISION FOOD WORKERS	1	0	NA	--	--	2	0	NA	--	--
688	PRECISION INSPECTORS, TESTERS, & RELATED WORKERS	24	20	1.153	0.608387	2.18534	2	5	0.2771	0.044287	1.73463
6881	PRECISION INSPECTORS, TESTERS, AND GRADERS	24	18	1.2421	0.644681	2.39345	2	4	0.38	0.0533186	2.70946
6882	PRECISION ADJUSTERS AND CALIBRATORS	0	2	NA	--	--	0	1	NA	--	--
69	PLANT & SYSTEM OPERATORS	21	16	1.4885	0.746672	2.96764	0	1	NA	--	--
691	WATER & SEWAGE TREATMENT PLANT OPERATORS	4	2	2.1852	0.382966	12.4697	0	0	NA	--	--
693	POWER PLANT OPERATORS	13	10	1.4165	0.595072	3.37205	0	0	NA	--	--
6931	STATIONARY ENGINEERS	11	8	1.5	0.575785	3.90814	0	0	NA	--	--
6932	POWER PLANT AND SYSTEMS OPERATORS, EXCEPT STATIONARY ENGINEERS	3	3	0.9375	0.168517	5.21638	0	0	NA	--	--
695	PETROLEUM PLANT OPERATORS	1	0	NA	--	--	0	0	NA	--	--
696	MISCELLANEOUS PLANT OR SYSTEM OPERATORS	3	4	0.8377	0.164652	4.26226	0	1	NA	--	--
71	SUPERVISORS, PRODUCTION OCCUPATIONS	70	79	0.9617	0.673432	1.37353	8	8	1.5492	0.50886	4.71648
73	MACHINE SETUP OPERATORS (METALS AND PLASTICS)	14	7	2.3078	0.896349	5.94183	2	0	NA	--	--
731-732	METALWORKING & PLASTIC WORKING MACHINE SETUP OPERATORS	6	5	0.8421	0.246451	2.87773	2	0	NA	--	--
7317	PRESS AND BRAKE MACHINE SETUP OPERATORS	0	0	NA	--	--	1	0	NA	--	--
7322	GRINDING, ABRADING, BUFFING, POLISHING MACHINE SETUP OPERATORS (a)	2	1	1.1944	0.0915831	15.5779	0	0	NA	--	--
7329	MISC METALWORKING AND PLASTIC WORKING MACHINE SETUP OPERATORS	4	3	1.2243	0.265642	5.64304	1	0	NA	--	--
733	METAL FABRICATING MACHINE SETUP OPERATORS	2	0	NA	--	--	0	0	NA	--	--
7339	MISCELLANEOUS FABRICATING MACHINE SETUP OPERATORS (a)	2	0	NA	--	--	0	0	NA	--	--
734	METAL & PLASTIC PROCESSING MACHINE SETUP OPERATORS	6	2	4.3607	0.818399	23.2358	0	0	NA	--	--
7342	MOLDING AND CASTING MACHINE SETUP OPERATORS (a)	4	0	NA	--	--	0	0	NA	--	--
7343	PLATING AND COATING MACHINE SETUP OPERATORS	1	2	0.3782	0.027247	5.25225	0	0	NA	--	--
7349	MISC METAL AND PLASTIC PROCESSING MACHINE SETUP OPERATORS (a)	1	0	NA	--	--	0	0	NA	--	--
74	MACHINE SETUP OPERATORS (MATERIALS OTHER THAN METALS AND PLASTICS)	11	16	0.7498	0.334872	1.6791	1	1	1.2653	0.0564498	28.3635
743	WOODWORKING MACHINE SETUP OPERATORS	3	5	0.7453	0.170959	3.24989	0	0	NA	--	--
7431	LATHE AND TURNING MACHINE SETUP OPERATORS	1	1	1.1669	0.0675969	20.1451	0	0	NA	--	--
7432	ROUTER AND PLANER MACHINE SETUP OPERATORS	1	3	0.3716	0.0366697	3.76576	0	0	NA	--	--
7433	SAWING MACHINE SETUP OPERATORS	1	2	0.8529	0.0762602	9.54	0	0	NA	--	--
744	PRINTING MACHINE SETUP OPERATORS	3	5	0.516	0.11433	2.32899	1	1	1.2653	0.0564498	28.3635
7443	PRINTING PRESS SETUP OPERATORS	3	3	0.8576	0.158195	4.64936	0	0	NA	--	--
7444	PHOTOENGRAVING AND LITHOGRAPHING MACHINE SETUP OPERATORS	0	0	NA	--	--	0	1	NA	--	--
7449	MISCELLANEOUS PRINTING MACHINE SETUP OPERATORS	0	2	NA	--	--	1	0	NA	--	--
745	TEXTILE MACHINE SETUP OPERATORS	2	3	0.9665	0.155444	6.01061	0	0	NA	--	--
7452	KNITTING AND WEAVING MACHINE SETUP OPERATORS	2	3	0.9665	0.155444	6.01061	0	0	NA	--	--
746-747	ASSORTED MATERIALS, MACHINE SETUP OPERATORS	4	5	0.7873	0.199119	3.11324	0	0	NA	--	--
7462	PACKAGING AND FILLING MACHINE SETUP OPERATORS	0	1	NA	--	--	0	0	NA	--	--
7463	EXTRUDING AND FORMING MACHINE SETUP OPERATORS	1	1	0.4909	0.0287228	8.3927	0	0	NA	--	--
7467	COMPRESSING AND COMPACTING MACHINE SETUP OPERATORS	0	1	NA	--	--	0	0	NA	--	--
7476	STILL, CLARIFYING, PRECIPITATING MACHINE SETUP OPERATORS	1	0	NA	--	--	0	0	NA	--	--
7479	MISCELLANEOUS MACHINE SETUP OPERATORS	2	2	1.3798	0.181772	10.4742	0	0	NA	--	--
75	MACHINE OPERATORS & TENDERS (METALS AND PLASTICS)	58	50	1.5852	1.04771	2.39862	7	6	1.48	0.455429	4.81002
751-752	METALWORKING & PLASTIC WORKING MACHINE OPERATORS & TENDERS	47	35	1.6236	1.01025	2.60935	5	3	2.075	0.460601	9.34824
7512	LATHE AND TURNING MACHINE OPERATORS AND TENDERS	11	11	1.0648	0.444162	2.55284	0	0	NA	--	--
7513	MILLING AND PLANING MACHINE OPERATORS AND TENDERS (a)	6	3	1.565	0.355217	6.89525	0	1	NA	--	--
7514	PUNCHING AND SHEARING MACHINE OPERATORS AND TENDERS (a)	6	3	2.3143	0.542541	9.87224	1	0	NA	--	--
7516	ROLLING MACHINE OPERATORS AND TENDERS	0	2	NA	--	--	0	1	NA	--	--
7517	PRESS AND BRAKE MACHINE OPERATORS AND TENDERS	0	1	NA	--	--	0	0	NA	--	--
7518	DRILLING AND BORING MACHINE OPERATORS AND TENDERS (a)	6	4	1.4173	0.357218	5.62381	1	0	NA	--	--
7522	GRINDING/ABRADING/BUFFING/POLISHING MACHINE OPERATORS	7	6	1.3076	0.402818	4.24524	3	0	NA	--	--
7529	MISC METALWORKING/PLASTIC WORKING MACHINE OPERATORS (a)	14	6	2.7603	1.00173	7.60655	0	1	NA	--	--
753	METAL FABRICATING MACHINE OPERATORS & TENDERS	3	6	0.5475	0.121546	2.46676	1	1	1.222	0.0720869	20.7155
7532	WELDING MACHINE OPERATORS AND TENDERS	1	1	1.1308	0.0648375	19.7234	0	0	NA	--	--
7533	SOLDERING AND BRAZING MACHINE OPERATORS AND TENDERS	0	0	NA	--	--	1	1	1.222	0.0720869	20.7155
7539	MISCELLANEOUS FABRICATING MACHINE OPERATORS AND TENDERS	2	5	0.419	0.0695237	2.52528	0	0	NA	--	--
754	METAL & PLASTIC PROCESSING MACHINE OPERATORS & TENDERS	10	9	1.0312	0.397296	2.67671	3	2	1.9011	0.252989	14.2868
7542	MOLDING AND CASTING MACHINE OPERATORS AND TENDERS	1	4	0.2352	0.0247084	2.2391	3	2	1.9011	0.252989	14.2868
7543	PLATING AND COATING MACHINE OPERATORS AND TENDERS	2	1	1.0555	0.0904468	12.3195	0	0	NA	--	--
7544	HEATING EQUIPMENT OPERATORS AND TENDERS	1	1	0.7742	0.0479253	12.5075	0	0	NA	--	--
7549	MISC METAL/PLASTIC PROCESSING MACHINE OPERATORS	6	3	2.3157	0.544482	9.84943	0	0	NA	--	--
76	MACHINE OPERATORS & TENDERS (MATERIALS OTHER THAN METALS AND PLASTICS)	158	152	1.187	0.916854	1.5369	42	49	1.154	0.705454	1.88792
763	WOODWORKING MACHINE OPERATORS & TENDERS	15	18	0.8087	0.383204	1.70665	3	4	0.8819	0.172988	4.49625
7631	LATHE AND TURNING MACHINE OPERATORS AND TENDERS	0	2	NA	--	--	0	0	NA	--	--
7632	ROUTER AND PLANER MACHINE OPERATORS AND TENDERS	0	1	NA	--	--	0	1	NA	--	--
7633	SAWING MACHINE OPERATORS AND TENDERS	3	8	0.3952	0.0996675	1.56742	2	0	NA	--	--
7634	SANDING MACHINE OPERATORS AND TENDERS	3	3	0.7628	0.133097	4.37235	2	1	1.4121	0.116277	17.1508
7635	SHAPING AND JOINING MACHINE OPERATORS AND TENDERS	2	0	NA	--	--	0	0	NA	--	--
7636	NAILING AND TRACKING MACHINE OPERATORS AND TENDERS	2	1	0.7568	0.0630538	9.08561	0	0	NA	--	--
7639	MISCELLANEOUS WOODWORKING MACHINE OPERATORS AND TENDERS	5	3	1.5438	0.346668	6.87528	0	2	NA	--	--
764	PRINTING MACHINE OPERATORS & TENDERS	9	17	0.5131	0.218658	1.20407	2	4	0.4853	0.0674545	3.49172
7642	TYPESETTING AND COMPOSING MACHINE OPERATORS AND TENDERS	0	3	NA	--	--	0	2	NA	--	--
7643	PRINTING MACHINE OPERATORS AND TENDERS	6	10	0.5685	0.198291	1.63	0	1	NA	--	--
7649	PRINTING MACHINE OPERATORS AND TENDERS, NEC	3	3	1.1688	0.2074	6.5871	1	1	0.3207	0.0175534	5.86234
765	TEXTILE, APPAREL & FURNISHINGS MACHINE OPERATORS & TENDERS	46	29	1.9768	1.19411	3.2727	27	32	1.0336	0.577168	1.85111
7651	WINDING AND TWISTING MACHINE OPERATORS AND TENDERS	7	6	1.1941	0.368527	3.86971	3	5	0.5758	0.127115	2.60913
7652	KNITTING AND WEAVING MACHINE OPERATORS AND TENDERS (a)	6	2	3.0891	0.597653	15.9669	3	1	4.668	0.45138	48.2748
7654	TEXTILE CUTTING MACHINE OPERATOR AND TENDERS	4	6	0.6513	0.161944	2.62016	0	2	NA	--	--
7655	TEXTILE SEWING MACHINE OPERATORS AND TENDERS (a, b)	4	1	5.749	0.548312	60.2786	11	10	1.664	0.647947	4.27351
7656	SHOE MACHINE OPERATORS AND TENDERS (a)	5	2	2.6852	0.494791	14.5727	5	7	0.9817	0.28341	3.40104
7657	PRESSING MACHINE OPERATORS (a)	4	1	3.3679	0.348791	32.5214	4	2	1.9516	0.326898	11.6523
7658	LAUNDERING AND DRY CLEANING MACHINE OPERATORS AND TENDERS	5	0	NA	--	--	1	2	0.4497	0.0271322	7.45518
7659	MISCELLANEOUS TEXTILE MACHINE OPERATORS AND TENDERS	14	12	1.2239	0.533258	2.80946	4	3	1.1614	0.244583	5.51576
766-767	MACHINE OPERATORS & TENDERS, ASSORTED MATERIALS	103	101	1.0585	0.778076	1.44008	13	20	0.8303	0.379567	1.81654
7661	CEMENTING AND GLUING MACHINE OPERATORS AND TENDERS	2	5	0.6493	0.117551	3.58661	3	2	2.0392	0.319797	13.0032
7662	PACKAGING AND FILLING MACHINE OPERATORS AND TENDERS	7	9	0.7003	0.244687	2.00472	1	4	0.3354	0.0328955	3.42046
7663	EXTRUDING AND FORMING MACHINE OPERATORS AND TENDERS	6	2	2.5895	0.493668	13.5832	0	1	NA	--	--
7664	MIXING AND BLENDING MACHINE OPERATORS AND TENDERS (a)	11	7	1.3058	0.481623	3.54039	1	1	0.7642	0.0442825	13.1884
7665	COOLING AND FREEZING EQUIPMENT OPERATORS AND TENDERS	0	3	NA	--	--	0	0	NA	--	--
7666	SEPARATING AND FILTERING MACHINE OPERATORS AND TENDERS	2	2	0.9265	0.125677	6.83028	1	0	NA	--	--
7667	COMPRESSING AND COMPACTING MACHINE OPERATORS AND TENDERS	2	3	0.2947	0.0460428	1.88733	0	0	NA	--	--
7668	BOILER OPERATORS AND TENDERS (LOW PRESSURE)	1	1	1.147	0.0665543	19.7699	0	0	NA	--	--
7669	COATING/PAINTING/SPRAYING MACHINE OPERATORS AND TENDERS (a)	10	3	3.5573	0.910548	13.898	0	0	NA	--	--
7671	PHOTOGRAPHIC PROCESSING MACHINE OPERATORS (a)	7	4	1.5922	0.452959	5.59713	0	3	NA	--	--
7672	ROASTING AND BAKING MACHINE OPERATORS AND TENDERS	1	0	NA	--	--	0	0	NA	--	--
7673	WASHING/CLEANING/PICKLING EQUIPMENT OPERATORS AND TENDERS	1	2	0.5012	0.0433685	5.79254	0	0	NA	--	--
7675	FURNACE, KILN, AND OVEN OPERATORS AND TENDERS	5	2	2.2184	0.402885	12.2159	0	1	NA	--	--
7676	STILL, CLARIFIER AND PRECIPITATOR OPERATORS AND TENDERS	2	3	0.5876	0.0941063	3.66912	0	0	NA	--	--
7677	CRUSHING AND GRINDING MACHINE OPERATORS AND TENDERS	9	14	0.5586	0.231198	1.34966	0	1	NA	--	--
7678	SLICING AND CUTTING MACHINE OPERATORS AND TENDERS	12	14	0.931	0.404487	2.14315	1	3	0.3275	0.0310684	3.45379
7679	MISCELLANEOUS MACHINE OPERATORS AND TENDERS, NEC	39	38	1.0332	0.635035	1.68125	6	5	1.2877	0.356771	4.6483
77	FABRICATORS, ASSEMBLERS, & HAND WORKING OCCUPATIONS	109	104	1.1186	0.82517	1.51647	36	40	1.3776	0.81828	2.31943
771	WELDERS & SOLDERERS	24	22	1.033	0.555829	1.92018	7	4	2.3697	0.622953	9.01436
7714	WELDERS AND CUTTERS	21	20	1.0272	0.532929	1.97998	1	1	1.6538	0.059157	46.2384
7717	SOLDERERS AND BRAZERS (b)	2	1	1.5818	0.128576	19.4603	6	3	2.5457	0.586002	11.0592
772	ASSEMBLERS	44	44	0.9214	0.582936	1.45667	16	27	1.0606	0.531809	2.1154
774	FABRICATORS, NEC	0	5	NA	--	--	2	2	1.0656	0.123616	9.18634
775	HAND WORKING OCCUPATIONS	48	39	1.5718	0.989777	2.49619	15	13	1.5126	0.667781	3.42645
7752	HAND SEWING OCCUPATIONS	4	7	0.574	0.155528	2.11854	4	1	6.2284	0.66012	58.7674
7753	HAND CUTTING AND TRIMMING OCCUPATIONS (a)	10	6	1.5023	0.517991	4.35708	5	2	3.2223	0.558212	18.6011
7754	HAND MOLDING AND CASTING OCCUPATIONS	1	1	0.4764	0.0281242	8.07113	1	0	NA	--	--
7755	HAND FORMING AND SHAPING OCCUPATIONS	1	1	2.1335	0.106216	42.8554	0	0	NA	--	--
7756	HAND PAINTING, COATING AND DECORATING OCCUPATIONS	10	8	1.072	0.384173	2.99145	2	2	1.4674	0.141276	15.2419
7757	HAND ENGRAVING AND PRINTING OCCUPATIONS	2	4	0.4688	0.0806681	2.72525	0	0	NA	--	--
7758	HAND GRINDING AND POLISHING OCCUPATIONS	4	5	0.5532	0.12629	2.42407	0	2	NA	--	--
7759	MISCELLANEOUS HAND WORKING OCCUPATIONS (a)	17	10	1.6294	0.704842	3.76714	5	6	1.0393	0.291172	3.71012
78	PRODUCTION INSPECTORS, TESTERS, SAMPLERS, & WEIGHERS	29	41	0.7791	0.465574	1.30389	14	8	3.5724	1.37724	9.26662
782	PRODUCTION INSPECTORS, CHECKERS & EXAMINERS (b)	16	25	0.6474	0.330415	1.2687	12	6	2.2348	0.746215	6.69332
783	PRODUCTION TESTERS (b)	9	10	1.2658	0.490962	3.26389	1	0	NA	--	--
784	PRODUCTION SAMPLERS & WEIGHERS	3	3	1.933	0.353945	10.5575	0	1	NA	--	--
785	GRADERS & SORTERS, EXCEPT AGRICULTURAL (b)	4	4	0.717	0.163778	3.13972	3	1	2.6885	0.24382	29.6453
787	PRODUCTION EXPEDITERS	0	1	NA	--	--	0	0	NA	--	--
81	SUPERVISORS, TRANSPORTATION & MATERIAL MOVING OCCUPATIONS	9	7	2.1331	0.767302	5.93019	0	0	NA	--	--
811	SUPERVISORS, MOTORIZED EQUIPMENT OPERATORS	7	7	1.5962	0.537257	4.7428	0	0	NA	--	--
8111	SUPERVISORS, MOTOR VEHICLE OPERATORS	3	6	0.7987	0.194904	3.27306	0	0	NA	--	--
8113	RAILROAD CONDUCTORS AND YARDMASTERS (a)	1	0	NA	--	--	0	0	NA	--	--
812	SUPERVISORS, MATERIAL MOVING EQUIPMENT OPERATORS (a)	2	0	NA	--	--	0	0	NA	--	--
82	TRANSPORTATION OCCUPATIONS	248	254	1.1128	0.894981	1.38378	8	10	0.8753	0.304992	2.51206
821	MOTOR VEHICLE OPERATORS	202	208	1.0421	0.824951	1.31653	8	9	0.9598	0.325898	2.82724
8212	TRUCK DRIVERS, TRACTOR-TRAILER	85	92	1.02	0.73	1.42	2	0	NA	--	--
8213	TRUCK DRIVERS, HEAVY	61	53	1.26	0.84	1.88	1	0	NA	--	--
8214	TRUCK DRIVERS, LIGHT (INCL DELIVERY AND ROUTE DRIVERS)	45	56	0.81	0.53	1.25	2	2	0.7827	0.106058	5.77665
8215	BUS DRIVERS	18	20	0.9748	0.486113	1.95507	3	5	0.8074	0.142091	4.58794
8216	TAXICAB DRIVERS AND CHAUFFEURS	23	21	1.0534	0.562736	1.9719	1	1	1.2753	0.0723519	22.4799
8218	DRIVER-SALES WORKERS	18	20	0.9172	0.458207	1.83608	1	0	NA	--	--
8219	OTHER MOTOR TRANSPORTATION OCCUPATIONS, NEC	1	0	NA	--	--	0	1	NA	--	--
823	RAIL TRANSPORTATION OCCUPATIONS	6	8	0.8915	0.276343	2.87626	0	0	NA	--	--
8232	LOCOMOTIVE OPERATING OCCUPATIONS	5	5	1.4861	0.380498	5.80437	0	0	NA	--	--
8233	RAILROAD BRAKE, SIGNAL, AND SWITCH OPERATORS	1	3	0.2187	0.0182297	2.62576	0	0	NA	--	--
824	WATER TRANSPORTATION OCCUPATIONS	30	29	1.3345	0.770938	2.31018	0	0	NA	--	--
8241	SHIP CAPTAINS AND MATES, EXCEPT FISHING BOATS	4	9	0.7581	0.216579	2.65378	0	0	NA	--	--
8242	BOAT AND BARGE OPERATORS	4	1	6.0577	0.606486	60.5065	0	0	NA	--	--
8243	SAILORS AND DECKHANDS (a)	19	13	1.6874	0.799638	3.56085	0	0	NA	--	--
8244	MARINE ENGINEERS	6	6	1.045	0.320162	3.41097	0	0	NA	--	--
825	AIRPLANE PILOTS & NAVIGATORS	20	16	1.6594	0.812984	3.38718	0	1	NA	--	--
828	TRANSPORTATION INSPECTORS	0	1	NA	--	--	0	0	NA	--	--
83	MATERIAL MOVING OCCUPATIONS, EXCEPT TRANSPORTATION	62	59	1.152	0.777594	1.70696	0	3	NA	--	--
831	MATERIAL MOVING EQUIPMENT OPERATORS	62	58	1.1692	0.787924	1.73527	0	3	NA	--	--
8312	OPERATING ENGINEERS	1	0	NA	--	--	0	0	NA	--	--
8314	HOIST AND WINCH OPERATORS	0	3	NA	--	--	0	0	NA	--	--
8315	CRANE AND TOWER OPERATORS	6	5	1.7172	0.495713	5.94874	0	0	NA	--	--
8316	EXCAVATING AND LOADING MACHINE OPERATORS	8	11	0.9112	0.342162	2.42701	0	0	NA	--	--
8317	GRADER, DOZER, AND SCRAPER OPERATORS	18	13	1.3985	0.657365	2.97554	0	2	NA	--	--
8318	INDUSTRIAL TRUCK AND TRACTOR EQUIPMENT OPERATORS	21	16	1.4874	0.740937	2.98608	0	1	NA	--	--
8319	MISCELLANEOUS MATERIAL MOVING EQUIPMENT OPERATORS	10	11	1.0548	0.412395	2.69806	0	0	NA	--	--
85	SUPERVISORS, HANDLERS, EQUIPMENT CLEANERS, HELPERS, & LABORERS	0	6	NA	--	--	0	1	NA	--	--
86	HELPERS	43	48	0.9567	0.611056	1.49796	0	0	NA	--	--
861	HELPERS, MACHINE OPERATORS & TENDERS	10	11	1.0673	0.424526	2.68364	0	0	NA	--	--
8616	HELPERS, PRINTING MACHINE OPERATORS AND TENDERS	1	1	0.8713	0.0336968	22.5297	0	0	NA	--	--
8617	HELPERS, TEXTILE/APPAREL/FURNISHINGS MACHINE OPERATORS	2	5	0.4903	0.0890708	2.69961	0	0	NA	--	--
8618	HELPERS, MACHINE OPERATORS AND TENDERS ASSORTED MATERIALS	4	1	5.6981	0.557725	58.2177	0	0	NA	--	--
8619	HELPERS, PRECISION PRODUCTION OCCUPATIONS AND SETUP OPERATORS	3	4	0.8224	0.167028	4.05007	0	0	NA	--	--
862	HELPERS, FABRICATORS & INSPECTORS	0	1	NA	--	--	0	0	NA	--	--
863	HELPERS, MECHANICS & REPAIRERS	2	4	0.3703	0.0629985	2.17693	0	0	NA	--	--
8632	HELPERS, VEHICLE/MOBILE EQUIPMENT MECHANICS AND REPAIRERS	1	2	0.4653	0.0410482	5.27587	0	0	NA	--	--
8633	HELPERS, INDUSTRIAL MACHINERY REPAIRERS	0	1	NA	--	--	0	0	NA	--	--
8637	HELPERS, MISCELLANEOUS MECHANICS AND REPAIRERS	1	0	NA	--	--	0	0	NA	--	--
864	HELPERS, CONSTRUCTION TRADES	29	32	1.0017	0.582681	1.72228	0	0	NA	--	--
8641	HELPERS, BRICKMASONS, STONEMASONS, AND HARD TILE SETTERS (a)	6	4	1.7133	0.461179	6.36564	0	0	NA	--	--
8642	HELPERS, CARPENTERS AND RELATED WORKERS	9	11	0.7637	0.297539	1.96024	0	0	NA	--	--
8643	HELPERS, ELECTRICIANS AND POWER TRANSMISSION INSTALLERS	4	7	0.5986	0.157687	2.27267	0	0	NA	--	--
8644	HELPERS, PAINTERS, PAPERHANGERS, AND PLASTERERS	1	0	NA	--	--	0	0	NA	--	--
8645	HELPERS, PLUMBERS, PIPEFITTERS AND STEAMFITTERS	4	4	1.015	0.230605	4.46797	0	0	NA	--	--
8646	HELPERS, SURVEYORS	1	3	0.5142	0.048636	5.43706	0	0	NA	--	--
8648	HELPERS, OTHER CONSTRUCTION TRADES	5	5	1.1427	0.316761	4.12259	0	0	NA	--	--
865	HELPERS, EXTRACTIVE OCCUPATIONS	2	2	0.7672	0.0934052	6.3029	0	0	NA	--	--
87	HANDLERS, EQUIPMENT CLEANERS & LABORERS	235	258	0.9382	0.752696	1.16953	29	41	0.8955	0.517796	1.54875
871	CONSTRUCTION LABORERS	25	35	0.8233	0.475664	1.42521	0	0	NA	--	--
872	FREIGHT, STOCK & MATERIAL MOVERS, HAND	75	94	0.7528	0.535227	1.05898	3	8	0.4797	0.118181	1.9474
8722	GARBAGE COLLECTORS	2	4	0.3115	0.0492743	1.97036	0	0	NA	--	--
8723	STEVEDORES	0	1	NA	--	--	0	0	NA	--	--
8724	STOCK HANDLERS AND BAGGERS	25	28	0.9327	0.521468	1.66828	0	2	NA	--	--
8725	MACHINE FEEDERS AND OFFBEARERS	9	14	0.6979	0.287086	1.69672	3	4	1.0898	0.224627	5.28768
8726	FREIGHT, STOCK, AND MATERIAL MOVERS, HAND, NEC	40	52	0.7344	0.467229	1.15446	0	2	NA	--	--
873	GARAGE & SERVICE STATION RELATED OCCUPATIONS	42	44	1.025	0.645067	1.62898	0	2	NA	--	--
874	PARKING LOT ATTENDANTS	3	2	1.5534	0.221987	10.8715	0	0	NA	--	--
875	VEHICLE WASHERS & EQUIPMENT CLEANERS	5	10	0.6185	0.201713	1.89648	1	0	NA	--	--
876	MISCELLANEOUS MANUAL OCCUPATIONS	127	119	1.097	0.822808	1.46264	25	32	0.9771	0.536938	1.7781
8761	HAND PACKERS AND PACKAGERS	15	23	0.7273	0.362877	1.45786	12	19	0.8954	0.396488	2.02252
8769	MANUAL OCCUPATIONS, NEC	113	101	1.131	0.832581	1.53659	14	18	0.849	0.396253	1.8191
91	MILITARY OCCUPATIONS	180	170	1.308	1.01832	1.68025	2	0	NA	--	--
	CI=95% Confidence interval; OR=odds ratio; NA=Not Applicable; NEC=Not Elsewhere Classified; SOC=Standard Occupational Classification
	(a) Included in the high-risk occupation adjustment for men (see text for definition of "high-risk" occupation).
	(b) Included in the high-risk occupation adjustment for women (see text for definition of "high-risk" occupation).
	(c) ORs and associated confidence intervals are adjusted for age at reference date (<55, 55-64, 65-74, 75+ years), race (white only, Native American/white, other races),
	Hispanic ethnicity (yes, no), state (Maine, Vermont, New Hampshire), smoking status (never, occasional [<100 cigarettes over lifetime], former, current), and employment in high-risk
	occupations other than the one being analyzed.
